1 **Integrative physiological, biochemical and transcriptomic analysis of hexaploid wheat roots**  
2 **and shoots provides new insights into the molecular regulatory network during Fe & Zn**  
3 **starvation**

4 **Om Prakash Gupta<sup>1\*#</sup>, Vanita Pandey<sup>1\*</sup>, Ritu Saini<sup>1</sup>, Tushar Khandale<sup>1</sup>, Ajeet Singh<sup>1</sup>,**  
5 **Vipin Kumar Malik<sup>1</sup>, Sneh Narwal<sup>1§</sup>, Sewa Ram<sup>1#</sup>, Gyanendra Pratap Singh<sup>2</sup>**

6 <sup>1</sup>Division of Quality and Basic Sciences, ICAR-Indian Institute of Wheat and Barley Research  
7 (IIWBR), Karnal, 132001, Haryana, INDIA

8 <sup>2</sup>Director, ICAR-Indian Institute of Wheat and Barley Research (IIWBR), Karnal, 132001,  
9 Haryana, INDIA

10 <sup>§</sup>Present Address: Division of Biochemistry, ICAR-Indian Agricultural Research Institute  
11 (IARI), New Delhi, 110012, INDIA

12 \*Om Prakash Gupta and Vanita Pandey contributed equally to this work

13

14 #Corresponding Author's Email:

15 Sewa Ram: [sewa.ram@icar.gov.in](mailto:sewa.ram@icar.gov.in);

16 Om Prakash Gupta: [op.gupta@icar.gov.in](mailto:op.gupta@icar.gov.in); (Orcid: <https://orcid.org/0000-0002-1498-9724>)

17

18

19

20

21

22

23

24

25

26 **Highlight**

27 Our work provides a crucial angle for a comprehensive understanding of the regulatory  
28 mechanism underlying Fe & Zn withdrawal associated with physiological, biochemical and  
29 transcriptional reprogramming in wheat.

30

31

32

33

34

35

36

37

38

39

40

41

42

43

44

45

46

47

48

49

50

51 **Abstract**

52 In plants, iron (Fe) & zinc (Zn) uptake and transportation from the rhizosphere to the grain is a  
53 critical process regulated by complex transcriptional regulatory networks. However,  
54 understanding the combined effect of Fe & Zn starvation on their uptake and transportation and  
55 the molecular regulatory networks that control them lack in wheat. Here, we performed a  
56 comprehensive physiological, biochemical and transcriptome analysis in two bread wheat  
57 genotypes, *i.e.* Narmada 195 and PBW 502, differing in inherent Fe & Zn content to understand  
58 the mechanism of Fe & Zn homeostasis. Compared to PBW 502, Narmada 195 exhibited  
59 increased tolerance to Fe & Zn withdrawal by an increased level of antioxidant enzymes and  
60 DPPH radical scavenging activity along with less malondialdehyde (MDA), H<sub>2</sub>O<sub>2</sub> level,  
61 increased PS accumulation and lower reduction of root and shoot Fe & Zn content and length,  
62 leaf chlorosis, and leaf area. By integrating physiological and biochemical data along with co-  
63 expression & functional genome annotation and gene expression analysis, we identified 25 core  
64 genes associated with four key pathways, *i.e.* Met cycle (10), PS biosynthesis (4), antioxidant (3)  
65 and transport system (8) that were significantly modulated by Fe & Zn withdrawal in both the  
66 genotypes. Genes of these four pathways were more considerably up-regulated in Narmada 195,  
67 allowing better tolerance to Fe & Zn withdrawal and efficient uptake and transportation of Fe &  
68 Zn. Chromosomal distribution and sub-genome wise mapping of these genes showed a  
69 contribution from all the chromosomes except group 5 chromosomes with the highest number of  
70 genes mapped to chromosome 4 (24%) and sub-genome D (40%). Besides, we also identified 26  
71 miRNAs targeting 14 core genes across the four pathways. Together, our work provides a crucial  
72 angle for an in-depth understanding of regulatory cross-talk among physiological, biochemical  
73 and transcriptional reprogramming underlying Fe & Zn withdrawal in wheat. Core genes  
74 identified can serve as valuable resources for further functional research for genetic improvement  
75 of Fe & Zn content in wheat grain.

76 **Key Words:** Wheat (*Triticum aestivum* L.), Fe & Zn withdrawal, transcriptome,  
77 phytosiderophore biosynthesis, methionine cycle, antioxidant enzymes, transporters, miRNAs

78

79

80

## 81 1. Introduction

82 Micronutrients, especially iron (Fe) & zinc (Zn), although required in small quantities, play a  
83 pivotal role during the growth and development of plants and adversely affects the productivity  
84 of crops under deficient conditions (Rout and Sahoo, 2015). Fe & Zn deficiency in crop plants  
85 also results in a lower concentration of these nutrients in grains and leads to their deficiency in  
86 human beings after long-term consumption. Cognitive & immune impairment are the two  
87 significant Fe & Zn associated deficiency symptoms in humans that affect overall growth and  
88 development (Wishart, 2017). Globally, over two billion people are affected by Fe deficiency  
89 (Singh *et al.*, 2018), and around 30% population of developing countries are afflicted with Zn  
90 deficiency (Hotz and Brown, 2004). Fe deficiency-linked anaemia affects roughly 25% of the  
91 global population, leading to the loss of over 46,000 disability-adjusted life years (DALYs) in  
92 2010 alone, and further, its deficiency caused mortality mainly in children under the age of 5  
93 (Murray and Lopez, 2013). Therefore, researchers worldwide are ascertaining different  
94 methodologies to produce Fe & Zn enriched crops to ease the associated deficiency symptoms.  
95 Since wheat is the second most crucial cereal crop contributing considerably to food and  
96 nutritional security globally, consumption of Fe & Zn deficient wheat can lead to micronutrient  
97 deficiency in humans causing hidden hunger. Therefore, increasing the efficacy of Fe & Zn  
98 absorption, transportation and their accumulation in the wheat grain is required to enhance their  
99 grain content to mitigate their deficiency in human beings. This needs a better understanding of  
100 physiological, biochemical and molecular components associated with Fe & Zn metabolism in  
101 root and shoot compartments.

102 Plants adapt two prominent strategies for the uptake of Fe & Zn from the rhizosphere.  
103 Strategy I include direct uptake of  $\text{Fe}^{2+}$  and  $\text{Zn}^{2+}$  by ZRT-, IRT-like proteins (ZIPs) by  
104 enrichment of soil with protons ( $\text{H}^+$ ) and other reducing agents (Kobayashi and Nishizawa,  
105 2012). Strategy II, generally used in graminaceous plants like wheat, operates *via* secretion of  
106 phytosiderophores (PSs), especially mugineic acid (MA), which chelate  $\text{Fe}^{3+}$  and the resulting  
107  $\text{Fe}^{3+}$  - PS complexes are subsequently taken up by transporters like yellow stripe-like (YSL), ZIP  
108 *etc.* (Sperotto *et al.*, 2012; Connorton *et al.*, 2017a). Nicotianamine (NA), a metal chelator,  
109 mediates radial transport of Fe & Zn through the root to the shoot (Deinlein *et al.*, 2012). Several  
110 transporters including ZIP, YSL and metal tolerance protein (MTP) families have been predicted  
111 to facilitate the remobilization of Fe and Zn from leaves to the grains and from the maternal

112 tissue into the endosperm cavity, aleurone and embryo (Tauris *et al.*, 2009) but their functional  
113 characterization is yet to be fully explained. Reports suggest considerable differences among  
114 wheat genotypes in tolerance to Fe & Zn deficiency (Hansen *et al.*, 1996; Cakmak *et al.*, 1994).  
115 Under both Fe & Zn deficiency, wheat plants exude higher PS content (Hansen *et al.*, 1996;  
116 Rengel *et al.*, 1998). Bread wheat synthesizes only one type of PS, *i.e.* 2'-deoxymugineic acid  
117 (DMA), where Met acts as a precursor (Mori and Nishizawa, 1987). DMA's biosynthesis starts  
118 with the conversion of the methionine (Met) into SAM by s-adenosylMet (SAM) synthetase.  
119 Later, nicotianamine synthases (NAS) combine three SAM molecules to form one molecule of  
120 NA, which is then converted to an intermediate called 3''-keto acid by NA aminotransferase  
121 (NAAT). This is followed by the synthesis of 2'-DMA by the subsequent action of a reductase,  
122 called DMA synthase (DMAS). Similarly, plants possess a complex antioxidant defence system  
123 comprising antioxidant enzymes and metabolites acting against reactive oxygen species (ROS)  
124 generated by several abiotic stresses, including metal deficiency (Kabir, 2016). Antioxidant  
125 enzymes, like superoxide dismutase (SOD), catalase (CAT), glutathione reductase (GR),  
126 peroxidase (POD), and ascorbate peroxidase (APX) *etc.*, are usually induced when plants are  
127 exposed to metal stress (Kabir, 2016). Therefore, understanding the role of antioxidative system  
128 genes in adaptation under Fe & Zn deficient conditions has become imperative. With the  
129 advancement of NGS technologies, several genome-wide approaches have been successfully  
130 exploited to study the global transcriptional changes under Fe and/or Zn stress in different crop  
131 plants, including maize (Mallikarjuna *et al.*, 2020), rice (Bandyopadhyay *et al.*, 2017; Zeng *et*  
132 *al.*, 2019) and wheat (Kaur *et al.*, 2019; Gupta *et al.*, 2020). Considerable variation in the  
133 expression profile of the genes mainly implicated in the Strategy II method of uptake was  
134 evident in crop plants when subjected to Fe and/or Zn deprivation (Quinet *et al.*, 2012; Bashir *et*  
135 *al.*, 2014; Kobayashi *et al.*, 2014; Li *et al.*, 2014). Similarly, Fe & Zn deficient condition in  
136 wheat plants have suggested the differential expression and essential role of many transcriptional  
137 regulators such as transcription factors (TFs) (Connorton *et al.*, 2017b; Sharma *et al.*, 2020) and  
138 critical gene(s) related to antioxidant enzymes, PS biosynthesis, and phytohormone homeostasis  
139 *etc.* (Schmidt *et al.*, 2000; Hindt and Guerinot, 2012). Despite the availability of advanced RNA  
140 sequencing (RNA-seq) based transcriptomic technologies and the availability of the sequenced  
141 wheat genome (IWGSC, 2014), very few reports are available to understand the molecular  
142 mechanism of wheat plant's responses to Fe & Zn stress (Borrill *et al.*, 2018; Mishra *et al.*, 2019;

143 Gupta *et al.*, 2020). Since Fe & Zn deficiency based appearance of phenotypes, especially their  
144 content in the grain, is the cumulative effect of physiological, biochemical and molecular  
145 reprogramming and studies deciphering the combined effect of these pathways in efficient and  
146 inefficient wheat genotypes under Fe & Zn deficiency is purely absent.

147 Therefore, in this investigation, two wheat genotypes, namely Narmada 195 and PBW 502  
148 differing in grain Fe & Zn content, were used to understand the physiological, biochemical and  
149 molecular effect of Fe & Zn withdrawal in the nutrient solution. Twelve RNA-seq libraries  
150 generated from each genotype's root and shoot tissues from different treatments represented  
151 RNAs expressed during control, partial (T1) and complete Fe & Zn withdrawal (T2). Besides  
152 analyzing the genome-wide expression profile of various transcripts associated with Fe-Zn  
153 metabolism, expression of 25 transcripts directly associated with PS biosynthesis, Met cycle,  
154 antioxidant system and the transport was also investigated using reverse transcription (RT)-  
155 qPCR to decipher the fold change variation during withdrawal. Overall, our results provide a  
156 unique and comprehensive insight into molecular, physiological and biochemical responses of  
157 two contrasting wheat genotypes under Fe & Zn withdrawal conditions.

## 158 **2. Materials and Methods**

### 159 **2.1 Experimental setup-plant growth, Fe & Zn deficiency conditions and sampling**

160 We selected two diverse hexaploid wheat varieties, namely Narmada 195 and PBW 502, in the  
161 current study as they exhibited different grain Fe & Zn content, with the former being more  
162 efficient than the latter (Table 1). The detailed outline of the experimental procedure is given in  
163 Fig. 1. Briefly, seeds were treated with 1% NaOCl for 10 min, followed by rinsing with distilled  
164 water three times. The sterilized seeds were subjected to cold stratification at 4<sup>0</sup>C overnight in  
165 the dark to break the dormancy, followed by germination for four days in Petri dishes  
166 containing three layers of moist and sterile Whatman filter paper. Subsequently, the seedlings  
167 were transferred to synthetic floater placed in polycarbonate Phyta Jar (75 x 74 x 138mm,  
168 Himedia, India) with 500 ml top size. We designed each synthetic floater with utmost care to  
169 accommodate nine seedlings at an equidistant position (Supplementary Fig. 1). Three  
170 treatments, *i.e.* control [C: Hoagland solution comprising full strength Fe (100  $\mu$ M) & Zn (0.77  
171  $\mu$ M)], treatment 1 [T1: Hoagland solution comprising half-strength Fe (50  $\mu$ M) & Zn (0.38  
172  $\mu$ M)] and treatment 2 [full strength for 18 days including four days germination on Petri plates

173 followed by 0  $\mu\text{M}$  Fe & Zn for the next 12 days], were used in the present study to see the  
174 differential response of Fe & Zn on contrasting wheat genotypes. Hoagland solution was  
175 prepared following the protocol of Yordem *et al.*, 2011 and frequently replaced on every  
176 alternate day. Seedlings were grown for 30 days in a growth chamber (E36H0; Percival  
177 Scientific Inc. Perry, IA) maintained with a 16 h day/8 h night cycle at  $20\pm 1$  °C, 50–70%  
178 relative humidity, and a photon rate of 300  $\mu\text{mol}$  quanta  $\text{m}^{-2}\text{s}^{-1}$ . Each genotype was represented  
179 with three independent biological replications for each treatment. For transcriptome,  
180 physiological and biochemical analysis, root and shoot tissues were independently harvested  
181 and snap-frozen in liquid nitrogen and stored at  $-80$  °C until further use.

## 182 **2.2 Physiological characterization**

### 183 **2.2.1 Measurement of growth parameters**

184 We harvested plants after 30 days of sowing grown under control, T1 and T2 conditions for  
185 measuring the different growth parameters. Root length was measured using Root Scanner  
186 (Model, Epson Perfection V 700 Photo, Win-RHIZO Programme V. 2009 c 32-bit Software)  
187 following the manufacturer's protocol and shoot height was measured using a standard scale.  
188 After washing with deionized water, roots were placed on a 150 mm wide Petri plate filled with  
189 distilled water to manually observe the primary root and the first-order lateral root characteristics  
190 in each plant. To determine root characteristics, we used six wheat seedlings for each of the  
191 treatments, including three biological replicates. Each sample's leaf area was determined using a  
192 Digital Leaf Area Meter (YMJ-C Series, China) following the manufacturer's instructions. Three  
193 technical replicates were evaluated for each parameter.

### 194 **2.2.2 Determination of chlorophyll content and phytosiderophore assay**

195 A chlorophyll meter (SPAD-502, Minolta, Japan) was used to estimate leaf chlorophyll  
196 concentration (SPAD value). Three biological replicates and three technical replicates per  
197 treatment were selected, and SPAD values were recorded from the fully matured leaves counted  
198 from the top of the plants.

199 Release of PS was estimated by Fe mobilization assay as per the method of Takagi,  
200 1976. Briefly, nine seedlings from each of three biological replicates representing control, T1  
201 and t2 conditions were undertaken for PS release assay under aeration for 4h in 20 ml deionized  
202 water. The assay was performed after 2h of exposure to a light period. After that, 8 ml of the  
203 collection solution was added to 0.5ml of 0.5M Na acetate buffer (pH 5.6), followed by 2 ml of



204 the freshly prepared solution of Fe(OH)<sub>3</sub>. The resulting solution was stirred for 2h and filtered  
205 using Whatman #1, and the filtrate was mixed with 0.2ml of 6N HCl. The mixture was treated  
206 with 0.5ml of 8% hydroxylamine-hydrochloride by heating at 60°C for 20 min to reduce ferric  
207 iron. 1ml of 2M Na-acetate buffer (pH 4.7) and 0.2ml of 0.25% ferrozine was added into the  
208 above solution, and absorbance was taken at 562 nm as per the method of Khobra and Singh,  
209 2018.

## 210 **2.3 Biochemical characterization**

### 211 **2.3.1 Enzymatic assays and determination of antioxidant capacity**

212 Enzymes related to the antioxidant activity such as CAT, SOD and GR were estimated in  
213 seedlings at 30 DAS. Briefly, 200 mg seedlings were ground in liquid nitrogen and thoroughly  
214 homogenized in 1.2ml of 0.2M potassium phosphate buffer (pH 7.8 with 0.1mM EDTA)  
215 followed by centrifugation at 15,000×g for 20 min at 4°C. The supernatant was collected in fresh  
216 tube, and the pellet was redissolved in 0.8ml of the same buffer and centrifuged at 15,000×g for  
217 15 min. The resulting supernatants were combined with the first extracts and stored at 4°C and  
218 used to estimate the different antioxidant enzyme activities.

219 The CAT activity was analyzed in a 3ml assay mixture comprising 2.94ml of 50mM  
220 phosphate buffer (pH 7.0), 50µl supernatant and 10µl of 30% H<sub>2</sub>O<sub>2</sub>. Once supernatant is added,  
221 the extinction coefficient of H<sub>2</sub>O<sub>2</sub> (40mM<sup>-1</sup>cm<sup>-1</sup> at 240 nm) was used to calculate the enzyme  
222 activity and expressed in terms of millimoles of H<sub>2</sub>O<sub>2</sub> decomposed m<sup>-1</sup> gFW<sup>-1</sup> (Aebi and Lester,  
223 1984). For measurement of the activity of SOD, 100 ul of supernatant was mixed in a 2.5ml  
224 reaction mixture comprising 50mM phosphate buffer (pH 7.8) (constituting 2mM EDTA, 9.9mM  
225 L-Met, 55µM NBT, and 0.025% Triton-X100) and 400µl of 1mM riboflavin. The reaction was  
226 started by illuminating the samples for 10 min, followed by recording the absorbance at 560nm  
227 instantaneously after the reaction was stopped. The enzyme activity (gFW<sup>-1</sup>) was estimated from  
228 a standard curve obtained using pure SOD (Beyer and Fridovich, 1987). For GR activity  
229 determination, 100µl of supernatant was mixed with 3 ml of assay mixture comprising 0.75mM  
230 DTNB, 0.1mM NADPH, and 1mM GSSG (oxidized glutathione). The reaction was initiated by the  
231 addition of GSSG, and the upsurge in absorbance (412nm) was recorded for 5 min. The GR  
232 activity was calculated using an extinction coefficient of TNB (14.15M<sup>-1</sup>cm<sup>-1</sup>) and expressed in  
233 millimole TNB m<sup>-1</sup> gFW<sup>-1</sup> (Smith *et al.*, 1988).



234 For determination of hydrogen peroxide (H<sub>2</sub>O<sub>2</sub>), 500mg of tissue were homogenized with  
235 5.0ml trichloroacetic acid (TCA) (0.1%, w/v, 4°C) and centrifuged at 12,000g for 15 min. The  
236 absorbance (390nm) was recorded by mixing 0.5ml of supernatant with 0.5ml of 10 mM  
237 potassium phosphate buffer (pH 7.0) and 1ml of 1M KI. The results were expressed as  $\mu\text{molg}^{-1}$   
238 FW using the extinction coefficient of  $0.28\mu\text{M}^{-1}\text{cm}^{-1}$  (Velikova *et al.*, 2000). Malondialdehyde  
239 (MDA) content was estimated as previously described (Kosugi and Kikugawa, 1985). Briefly,  
240 wheat tissues were finely ground in 20% TCA with 0.5% 2-thiobarbituric acid (TBA) followed  
241 by heating at 95°C for 30 min and centrifugation for 10 min at 5000×g at 25°C. The supernatant  
242 was used to measure the absorbance at 532nm and 600nm, and MDA content was calculated by  
243 deducting the non-specific turbidity at 600nm by its molar extinction coefficient (Kosugi and  
244 Kikugawa, 1985). DPPH (2,2-diphenyl-1-picrylhydrazyl) free radical assay (Brand-Williams *et*  
245 *al.*, 1995) measured the percentage of antioxidant capacity (AA%) of 30 days old wheat tissues.  
246 The reaction mixture contained 0.5ml of the seedling sample, 3ml of absolute ethanol and 0.3ml  
247 of DPPH radical solution diluted to 0.5mM in ethanol. After 10 min. of incubation, the change in  
248 colour from deep violet to light yellow was recorded at 517nm and the DPPH scavenging  
249 activity was then calculated according to the formula given by Mensor *et al.*, (2001).

### 250 **2.3.2 Determination of Fe & Zn concentration**

251 For estimating Fe & Zn content, root and shoot tissues were carefully washed with  
252 CaSO<sub>4</sub> (1mM) and deionized water followed by drying in an oven at 80°C for two days (Kabir *et*  
253 *al.*, 2015). The dried tissues (0.5g) were mixed in 7ml HNO<sub>3</sub> and digested in a micro-digestion  
254 system following the Organic B program (Microwave digestion system, Anton Paar). The  
255 concentration of Fe & Zn was then analyzed by Flame Atomic Absorption Spectroscopy (ECL,  
256 India). Standard solutions of Fe & Zn were separately prepared from their respective  
257 concentration of stock solutions.

### 258 **2.4 Statistical analysis**

259 Three independent biological replications for each sample were used for physiological and  
260 biochemical analysis. Data were subjected to one-way ANOVA by IBM SPSS package v. 20  
261 (IBM Corp., New York, USA), and means were compared by Duncan's multiple range test at a  
262 5% significance level ( $P < .05$ ).

### 263 **2.5 RNASeq analysis**

#### 264 **2.5.1 RNA isolation, cDNA library construction, and Illumina sequencing**

265 For transcriptome analysis, thirty days old seedlings (root and shoot) were used for RNA  
266 isolation and sequencing on the Illumina HiSeq4000 platform (Genotypic Technology Pvt. Ltd.,  
267 Bangalore). RNA extractions were performed independently from each of the three biological  
268 replicates. Total RNA was extracted from root and shoot of all the three treatment conditions, *i.e.*  
269 C, T1 and T2, using the Qiagen RNeasy Plant Mini kit (Netherland) as per the manufacturer's  
270 instruction. The yield and purity of RNA were evaluated by Nanodrop1000 spectrophotometer  
271 (NanoDrop, USA) and 1% denaturing RNA agarose gel, respectively. Before library preparation,  
272 the quality of all the RNA samples was thoroughly evaluated by Bioanalyzer 2100 (Agilent,  
273 USA) to ensure >8.5 RNA integrity number (RIN). RNA-seq library was prepared using  
274 NEBNext® Ultra™ directional RNA library prep kit (New England BioLabs, MA, USA)  
275 following the manufacturer's instruction. The sequencing libraries were quantified by Qubit  
276 fluorometer (Thermo, USA) followed by an analysis of fragment size distribution on Agilent  
277 2200 TapeStation (Agilent, USA). The average mean of the fragment size of all the libraries was  
278 465 bp. The 2×150 bp chemistry was used for sequencing on the Illumina HiSeq4000 platform to  
279 produce on an average of 45.7 million raw sequencing reads per library.

### 280 **2.5.2 RNA-Seq data processing and assessment of differential gene expression**

281 To ensure high-quality clean reads, we performed adapter trimming, removing low quality reads  
282 (QV <30 Phred score) and ambiguous N nucleotides (reads with unknown nucleotides 'N' >5%)  
283 using Trimmomatic-0.39 (Bolger *et al.*, 2014). The raw reads quality was ensured by FastQC  
284 (<http://www.bioinformatics.babraham.ac.uk/projects/fastqc/>). Finally, high-quality processed  
285 (QV>30), paired-end reads were de-novo assembled using a graph-based approach using  
286 maSPAdes program (Bankevich *et al.*, 2012). To reduce the redundancy without excluding  
287 sequence diversity required for further transcript annotation and the differential expression  
288 analysis, assembled transcripts were clustered using CD-HIT-EST (Fu *et al.*, 2012) with 95%  
289 similarity between the sequences. Processed reads from each library were mapped back to the  
290 final assembly using Bowtie2 (Langmead and Salzberg, 2012) with end-to-end parameters.  
291 DESeq R package (Anders and Huber, 2010) was used for differential expression analysis.  
292 Uneven sequencing library size and depth bias among the samples were scrubbed by library  
293 normalization using size factor calculation in DESeq. Log<sub>2</sub> fold change (FC) values >1 were  
294 considered up-regulated, whereas those with an FC <1 were down-regulated. For their significant  
295 expression, these genes were further analyzed considering the statistical significance ( $P<0.05$ )

296 and the false discovery rate (FDR 0.05) after Benjamin–Hochberg corrections for multiple  
297 testing. Clustv (<http://biit.cs.ut.ee/clustvis/>) was employed to construct heat maps for selected  
298 differentially expressed genes (DEGs) using the normalized expression values of genes.

### 299 **2.5.3 Gene Annotation, filtering and functional enrichment analysis of differentially** 300 **expressed genes (DEGs) along with SSR mining**

301 Gene annotations and functional enrichment analysis were carried out using multiple databases  
302 (GO term, Uniprot, KEGG pathway, Pfam, and PlnTF) to identify DEGs from both the root and  
303 shoot samples of C, T1 and T2 conditions and were significantly enriched in GO terms or  
304 biological pathways. Clustered transcripts were annotated using the homology approach to assign  
305 functional annotation using BLAST (Altschul *et al.*, 1990) tool against viridiplantae and *Triticum*  
306 proteins from UniProt database with e value  $<e^{-5}$  and minimum similarity  $>30\%$ . Pathway  
307 analysis was performed using KAAS server (Finn *et al.*, 2015) by considering *Oryza sativa*  
308 *japonica* (Japanese rice), *Zea mays* (maize), *Musa acuminata* (wild Malaysian banana) and  
309 *Dendrobium catenatum* as reference organisms. Gene annotations against the GO database  
310 (<http://geneontology.org/>) were performed using the Blast2Go program. GO terms and biological  
311 pathways against the KEGG database (<http://www.genome.jp/kegg>) with a *p*-value  $< 0.05$  were  
312 deemed to be significantly enriched in DEG analysis. Additionally, SSRs were identified in each  
313 transcript sequence using default parameters of MISA Perl script with simple repeat motif length  
314 ranging from monomer to hexamer (Finn *et al.*, 2016). To comprehend the conserved domains,  
315 Pfam Scan was used to predict the Pfam domain. Transcripts encoding TF were identified by  
316 homology search against known plant TFs from Plant TFdb. Venn diagram (VENNY 2.1) was  
317 constructed to highlight unique and common transcripts among genotypes, tissues, and  
318 treatments. Volcano Plot was created using Volcano Plot  
319 (<https://paolo.shinyapps.io/ShinyVolcanoPlot/>). An interaction network of selected genes was  
320 created using STRING 11.0.

### 321 **2.5.4 Quantitative reverse transcription PCR (RT-qPCR) validation**

322 To further cross-check the reliability of RNA-Seq expression results, RT-qPCR was performed  
323 using the SYBR Green (Maxima SYBR Green qPCR Master Mix, Thermo Fisher Scientific) on  
324 a C1000<sup>TM</sup> Touch Thermal Cycler (CFX96<sup>TM</sup>, BioRad). Briefly, total RNA isolated from all the  
325 treatment conditions, *i.e.* the C, T1 and T2, was treated with DNase I (Thermo Scientific) to  
326 remove DNA contamination in each sample. The first-strand cDNA was synthesized using the

327 Maxima First-strand cDNA synthesis kit (Thermo Scientific) following the manufacturer's  
328 guidelines. For qPCR, twenty-five differentially expressed genes belonging to Fe & Zn  
329 metabolism, including Met cycle, PS biosynthesis, antioxidant and transport system, were  
330 selected for experimental validation in response to various treatments of Fe & Zn withdrawal  
331 (Table S1). ADP-ribosylation factor 1 (ARF1) and actin were used as an internal control for  
332 expression normalization. As shown in Table S1, specific primers for real-time PCR were  
333 designed by Primer Premier 5.0 software (Premier Biosof International). All amplification  
334 programmes were: 95°C for 5min, followed by 40 cycles at 95°C (15s), 58°C (20s) with  
335 fluorescent signal recording at 72°C for 30s. Three independent biological replicates with three  
336 technical replicates were performed on each cDNA. The relative expression levels of genes were  
337 calculated using the formula  $2^{-\Delta\Delta C_t}$  (Livak and Schmittgen, 2001). The student's *t*-test ( $P < 0.05$ )  
338 was conducted to evaluate the significance of mean values.

### 339 **2.5.5 Identification of miRNAs and *in silico* functional characterization of Fe & Zn** 340 **transport-related genes**

341 Since miRNAs are critical regulators of gene expression during every stage and condition of the  
342 plant life cycle, we mined miRNAs from the selected transcripts obtained from RNA-Seq data  
343 regulating Fe & Zn metabolism, including Met cycle, PS biosynthesis, antioxidant system and  
344 transporters. The nucleotide sequences were manually retrieved from fastaseq file and used as a  
345 query sequence to mine the corresponding miRNA on psRNATarget: A Plant Small RNA Target  
346 Analysis Server (2017 Update) (<https://plantgrn.noble.org/psRNATarget/home>). The query  
347 sequences were used against published wheat miRNAs following the preset default programme.  
348 Further, transmembrane helix and topology analysis were performed to characterize the possible  
349 nature of essential protein using HMMTOP, MEMSAT3 and MEMSAT-SVM programs from  
350 the PSIPRED server. Also, the plausible subcellular localization of proteins was dogged using  
351 TargetP server (<http://www.cbs.dtu.dk/>) (Emanuelsson *et al.*, 2000), MEMSAT SVM and  
352 ProtComp v. 9.0. FFPred 3 program (PSIPRED server) was used to determine gene ontology  
353 domains *viz.* molecular function, biological process, and cellular component.

### 354 **2.5.6 Accessions numbers**

355 The data generated from this study have been deposited in the NCBI Sequence Read Archive  
356 (SRA) database and are accessible with the submission ID-SUB6954440 and BioProjectID-  
357 PRJNA605691.

### 358 **3. Results**

#### 359 **3.1 Fe & Zn withdrawal agonies physiological growth and phytosiderophore release in** 360 **wheat**

361 Fe & Zn starved seedlings of wheat genotypes developed distinct phenotypic responses observed  
362 at 30 DAS. A significant decrease in the total leaf area was observed in both the genotypes under  
363 T1 and T2 conditions, but the decline was more prominent in inefficient genotype PBW 502  
364 (51% and 49% for T1 and T2, respectively) compared to efficient genotype Narmada 195 (33%  
365 and 35% for T1 and T2, respectively) (Table 2). Compared to control, we observed a significant  
366 decrease in the shoot length and enhanced chlorosis in both the genotypes under T1 and T2  
367 conditions, with more prominent symptoms in PBW 502 (Fig. 2A & B; Table 2). The reduction  
368 of shoot length was more significant in genotype PBW 502 where a decline of 44% and 51% was  
369 observed compared to 38% and 40% in Narmada 195 for T1 and T2, respectively (Table 2). The  
370 chlorophyll content decreased significantly in both the genotypes compared to controlled  
371 conditions, as is evident by the progressive chlorosis symptoms developed under T1 and T2.  
372 Compared to Narmada 195, we observed a steeper reduction of chlorophyll content in PBW 502,  
373 *i.e.* 38% and 81% under T1 and T2 conditions, respectively (Table 2). Compared to the control  
374 condition, there was a significant decrease in the number of lateral roots in both genotypes under  
375 T1 and T2 conditions (Fig. 2C & D). There was no substantial change in root length as measured  
376 in both the genotypes under the T1 condition. Moreover, the root length increased slightly in  
377 Narmada 195 and decreased in PBW 502 under the T2 condition compared to the control  
378 condition (Table 2).

379 On the other hand, estimation of Fe & Zn content in roots and shoots of both the  
380 genotypes suggested a significant decrease under both T1 and T2 conditions (Table 2); however,  
381 the decline was more evident in PBW 502 as compared to Narmada 195. The inefficient  
382 genotype PBW 502 suffered more reduction in Fe concentration in both roots and shoots under  
383 T1 (34%, 46% respectively) and T2 (76%, 82% respectively) (Table 2). Zn content decreased  
384 more in shoot than root, indicating a severe effect on Zn's translocation in shoot under stress. Zn  
385 deficiency caused a decline of 34% in T1 and 60% in T2 of PBW 502 compared to controlled  
386 conditions (Table 2). Moreover, PS quantification showed that roots of Narmada 195 released  
387 more PS than roots of PBW 502 when plants were subjected to nutrient-deficient conditions, *i.e.*

388 T1 and T2, with a maximum release under T2 condition (Table 3). This kind of favoured PS  
389 release in Narmada 195, even under T2 condition, signifies the genotypes dependent responses to  
390 efficient Fe and Zn transport and remobilization over other less efficient wheat genotypes.

### 391 **3.2 Reactive oxygen species (ROS) and antioxidant scavenging system triggered during Fe** 392 **& Zn withdrawal in wheat root and shoot**

393 Reactive oxygen species and enzymes (SOD, CAT and GR) related to the antioxidant system  
394 were measured in seedlings to evaluate the effect of Fe & Zn withdrawal on their activity in both  
395 the wheat genotypes grown under C, T1 and T2 conditions. The result showed that the activity of  
396 SOD decreased significantly in both Narmada 195 and PBW 502 under both T1 (1.19-fold in  
397 Narmada 195; 2.17-fold in PBW 502) and T2 (3-fold in Narmada 195; 7.6-fold in PBW 502)  
398 conditions (Table 3). At the same time, the activity of CAT increased significantly in Narmada  
399 195 under T1 (1.65-fold), and T2 (2.16-fold) compared to PBW 502 genotype where the increase  
400 (1.03-fold in T1 and 1.07-fold in T2) was not significant (Table 3). In contrast, GR and total  
401 antioxidant activities (DPPH radical scavenging activity) increased in both Narmada 195 and  
402 PBW 502 under Fe & Zn deficiency in both treatments, but the increase was more noticeable in  
403 Narmada 195 (Table 3). Content of H<sub>2</sub>O<sub>2</sub> and MDA increased significantly in both the genotypes  
404 with a more pronounced effect in Narmada 195 (Table 3).

### 405 **3.3 Transcriptome analysis of root and shoot of contrasting wheat genotypes in response to** 406 **Fe & Zn withdrawal**

407 To dissect the molecular cross-talk of Fe & Zn uptake and remobilization in root and shoot, we  
408 performed RNA-Seq analysis of two contrasting wheat genotypes (Narmada 195: efficient; PBW  
409 502: inefficient) differing in total grain Fe & Zn content. Transcriptome data analysis resulted in  
410 an average of 43 million, ranging from 39 to 54 million, quality-filtered reads with an average  
411  $\geq$ Q30 score of 94.52% (Supplementary Table S2). Around 77.5% of filtered reads were aligned  
412 back to the clustered transcripts (Supplementary Table S2). *De novo* assembly generated 176125  
413 transcripts with a total length of 145224130 bp and an average length of 824 bp (Supplementary  
414 Table S3). The maximum transcripts were in size range of 300-500 bp (46.5%), followed by 1k-  
415 5k bp (23.7%) and 500-800 bp (21.6%) (Supplementary Table S3). Differential expression  
416 analysis was performed using the DESeq R package (Anders and Huber, 2010). Using a  
417 threshold value of logFC>1 for up-regulation, <1 for down-regulation with FDR of <0.05, T2



418 condition showed higher number of up (45518 & 25780 in root and 50735 & 17687 in shoot in  
419 Narmada 195 and PBW 502, respectively) and down (64205 & 22221 in root and 56618 &  
420 19547 in shoot in Narmada 195 and PBW 502, respectively) regulated transcripts in both the  
421 tissues in Narmada 195 compared to T1 condition (up-regulated: 22462 & 48521 in root and  
422 16617 & 53355 in shoot; down-regulated: 18646 & 57414 in root and 19406 & 55597 in shoot in  
423 Narmada 195 & PBW 502, respectively) (Fig. 3A). Compared to control, there was exclusive  
424 induction of a significant number of transcripts in both the genotypes under T1 and T2  
425 conditions, with the maximum in Narmada 195 (Fig. 3A). Next, we observed that 121 (C),  
426 124150 (T1) and 75433 (T2) genes were shared in both root and shoot of both the wheat  
427 genotypes along with greater tissue and genotype-specific expression patterns (Fig. 3 B-D).  
428 Compared to PBW 502, Narmada 195 showed the larger number of tissue-specific expression  
429 pattern with the maximum in root under both T1 (2471: root; 872: shoot) (Fig. 3C) and T2 (7845:  
430 root; 6639-shoot) conditions (Fig. 3D; Supplementary Fig. S2 A&B). We observed 155242  
431 shared transcripts in both the genotypes across the tissues and treatment condition  
432 (Supplementary Fig. S2C). Interestingly, this core set of shared DEGs showed significant  
433 differences in actual expression level in both the genotypes across the tissues and treatments  
434 (Fig. 3E-H; Supplementary Fig. S3). The analysis of gene expression profile across all the  
435 tissues, treatments and genotypes showed a positive correlation among commonly expressed  
436 genes ( $R^2 > 0.65$ ) (Fig. 3I).

### 437 **3.4 Identification, functional classification, and enrichment analysis of DEG in response to** 438 **Fe & Zn withdrawal in root and shoot**

439 The GO annotation, classification and enrichment analysis of DEGs were performed to gain  
440 more insight into their potential involvement during biological, molecular, and cellular functions.  
441 Significant GO categories were assigned to all the DEG under both the treatment conditions, *i.e.*  
442 T1 and T2. Around 59.25% of the DEGs were functionally annotated against the Uniprot  
443 viridiplantae database. GO analysis revealed maximum categories in biological processes (1958  
444 terms) followed by molecular function (1627 terms) and cellular component (523 terms)  
445 (supplementary table S4). The top ten over-represented significant terms of each of the three  
446 categories are given in Fig. 4A. ATP binding (11613 DEGs) and metal ion binding (3987 DEGs)  
447 were the most enriched GO term in the molecular function category, while integral components  
448 of the membrane (19337 DEGs) and nucleus (5768 DEGs) in the cellular component category



449 and regulation of transcription (2192 DEGs) and translation (1942 DEGs) in biological process  
450 category (Fig. 4A). The transcripts' E-value distribution showed that 58.77% of aligned  
451 transcripts had substantial similarity with an E-value  $<1e-60$ , whereas the remaining of the  
452 homologous sequences ranged from  $1e-5$  to 0 (Supplementary Fig. S4A). The similarity  
453 distribution in the reference showed that 47.45% of the sequences had a similarity higher than  
454 80% (Supplementary Fig. S4B). Furthermore, we performed the Kyoto Encyclopedia of Genes  
455 and Genomes (KEGG) pathway (Xie *et al.*, 2011) of DEGs to identify critical pathways affected  
456 during T1 and T2 condition in both the wheat genotypes. From 80716 annotated transcripts in the  
457 KAAS server, we identified 206 pathways related to the plants' various biological functions  
458 (Supplementary Table S5). Membrane trafficking (Ko04131) was the most abundant pathway in  
459 terms of the number of homologous transcripts, followed by chromosome and associated  
460 proteins (Ko03036) and exosome (Ko04147) (Fig. 4B). The maximum number of annotated  
461 DEGs were represented from *T. aestivum* (48%), followed by *T. Obliquus* (12%) and *N. nucifera*  
462 (7%) (Fig.4C; Supplementary Table S6).

### 463 **3.5 Identification and enrichment of DEGs associated with key Fe & Zn metabolic** 464 **pathways including Met cycle, PS biosynthesis, antioxidant pathway and transport system**

465 SAM, a substrate of the Met cycle, is used for the biosynthesis of PS that largely determine its  
466 accumulation and transport of Fe & Zn (strategy-II) throughout the plant system (Kobayashi and  
467 Nishizawa, 2012). Similarly, Fe & Zn stress also leads to the antioxidant pathway's modulation  
468 (Cakmak *et al.*, 1997). Therefore, to uncover the key genes involved in these Fe & Zn related  
469 pathways, we performed the enrichment analysis of DEGs based on the KEGG pathway and  
470 identified 25 core genes (Table 4). Further, 10, 8, 4 and 3 genes were enriched in the Met cycle,  
471 Fe & Zn transport, PS biosynthesis and antioxidant pathway, respectively (Table 4). Next, we  
472 analyzed the chromosomal distribution of these genes in the wheat genome. Interestingly, except  
473 for group 5 chromosomes, all other chromosomes contributed to these genes, with the highest  
474 number of genes mapped to group 4 (24%) and group 7 chromosomes (20%). Group 2, 3 & 6  
475 chromosomes contributed equally (16%) while chromosome 1 contributed only 4% (Fig. 5A).  
476 Further data analysis allowed us to map these core genes on different sub-genomes of wheat. The  
477 maximum number of genes were mapped on sub-genome D (40%) followed by sub-genome B  
478 (36%) and sub-genome A (24%) (Fig. 5B). As the interacting behaviour of the genes of linked  
479 pathways is crucial for proper substrate channelling, we performed STRING analysis to get more

480 insights into the interacting nature and co-expression of the core genes. Excitingly, we observed  
481 significant (p-value <1.0e-16) protein-protein interaction (PPI) among themselves, signifying  
482 that these core genes have expressively more interaction among themselves than what would be  
483 expected from a random set of proteins of similar size, drawn from the genome (Fig. 5C). Such  
484 enrichment shows that the proteins are at least partially biologically connected as a group. We  
485 also dissected these core genes at the protein level by *in-silico* analysis of transmembrane  
486 helices, MW, Pi, GRAVY and protein types. The results showed a range of these parameters,  
487 with eight protein being membrane-bound on different cell organelles signifying their organelle-  
488 specific role during Fe & Zn homeostasis (Supplementary Table S7).

### 489 **3.6 Differential expression analysis of core genes using RT-qPCR and RNA-Seq data** 490 **associated with Fe & Zn homeostasis**

491 Based on treatment and tissue conditions, we planned four different groups *viz.* (control Narmada  
492 195 root *vs* treated Narmada 195 root; control Narmada 195 shoot *vs* treated Narmada 195 shoot  
493 and control PBW502 root *vs* treated PBW502 root; control PBW502 shoot *vs* treated PBW502  
494 shoot) for DEG comparison. A heat map of the top 25 up and down-regulated DEGs from all the  
495 four groups is given in Supplementary Fig. S5a-d). Additionally, in response to Fe & Zn  
496 withdrawal, the expression landscape of up, down and neutrally regulated DEG in all the four  
497 groups is given in Supplementary Table S8-11. To confirm RNA-seq data's reliability, we also  
498 performed a more rigorous expression measure for 25 selected genes using RT-qPCR analysis.  
499 We observed a good agreement with a high linear correlation ( $R^2 > 0.8$ ; see supplementary Fig.  
500 S6) between RNA-seq and RT-qPCR technologies, suggesting RNA-seq analyses' reliability.  
501 Interestingly, the expression of the enriched 25 genes associated with four pathways, *i.e.* Met  
502 cycle, PS biosynthesis, Fe & Zn transport, and antioxidant pathway, represented substantial  
503 differences in expression profile across the treatment and tissue conditions in both the genotypes  
504 (Fig. 6A & B; 7A & B). The expression pattern of enriched genes was highly induced in T2  
505 compared to T1 in both the genotypes, but the level of gene stimulation was more predominant  
506 in the root of efficient genotype Narmada 195 compared to root and shoot of non-efficient PBW  
507 502 (Fig. 6A & B; 7A & B; Supplementary Fig. S7). Further, heat map analysis of 25 core genes  
508 showed the formation of two clusters, each specific for T1 and T2 conditions across the tissues  
509 and genotypes (Supplementary Fig. S7). The expression pattern of all the homoeologues of four  
510 pathways' core genes showed varying accumulation across the tissues and treatments

511 (Supplementary Table S12). Amongst genes of the Met cycle, Met synthase  
512 (TraesCS4B02G014700) was found to be highly induced followed by methylthioribose-1-  
513 phosphate isomerase (TraesCS4D02G104900) and 5-methylthioribose kinase  
514 (TraesCS2D02G545000), suggesting their crucial role during flux channelling towards PS  
515 biosynthesis (Fig. 6A). The NAS (TraesCS3B02G068500) and NAAT (TraesCS1B02G300600)  
516 were among the highly up-regulated genes of the PS biosynthesis pathway, followed by DMAD  
517 (TraesCS7A02G159200) and DMAS (TraesCS2D02G313700) (Fig. 6B), which could be  
518 associated with efficient utilization of SAM substrate in Narmada 195 root. Amongst Fe & Zn  
519 transporter genes, solute carrier family 30 (zinc transporter) (TraesCS6D02G406400), Natural  
520 resistance-associated macrophage proteins 2 (NRAMP2) (TraesCS4D02G299400), multidrug  
521 resistance protein (MDRP) 1 homolog (TraesCS3D02G257900) and vacuolar iron transporter  
522 (VIT) family protein (TraesCS7D02G413000) were highly induced in root of Narmada 195  
523 under T2 condition (Fig. 7A). The expression of GR (TraesCS6A02G383800) was highly  
524 induced, followed by SOD (TraesCS7A02G090400) and CAT (TraesCS6B02G056800) during  
525 Fe & Zn withdrawal conditions which could be associated with the triggering of the ROS  
526 pathway (Fig. 7B).

### 527 **3.7 Identification of transcriptional regulatory genes and protein families (Pfam) during Fe** 528 **& Zn withdrawal**

529 Several reports have evidenced the association of different transcription factors (TF) families  
530 including NAC, bHLH, EIN, PYE, MYB and WRKY during Fe & Zn homeostasis in  
531 *Arabidopsis* and rice model plants (Kobayashi *et al.*, 2007; Ogo *et al.*, 2007; Long *et al.*, 2010;  
532 Kobayashi and Nishizawa, 2012; Zamioudis *et al.*, 2014; Yan *et al.*, 2016; Wang *et al.*, 2019).  
533 To dissect the complex transcriptional regulatory network of Fe & Zn uptake, transport and  
534 remobilization, we identified vital genes encoding various TFs under T1 and T2 conditions.  
535 Based on RNA-Seq data, we identified 58 TF families (FDR  $\leq 0.05$ ) across the tissues and  
536 treatment conditions (Supplementary Table S13). Interestingly, further enrichment analysis of  
537 DEGs exhibited that bHLH (~3461) was the most abundant TF family followed by NAC  
538 (~2443), MYB (~2203) and WRKY (~2127), signifying their potential role during Fe & Zn  
539 homeostasis under both T1 and T2 conditions (Supplementary Table S13). Comparatively,  
540 Narmada 195 showed the highest number of up and down-regulated DEGs coding for different

541 TF families (Fig. 8) under T2 condition, whereas PBW 502 exhibited the highest number of up-  
542 and down-regulated DEGs under T1 condition (Fig. 8). This demonstrated that Narmada 195 has  
543 efficient transcriptional reprogramming of the gene networks related to efficient uptake and  
544 transportation even under Fe and Zn withdrawal conditions, thereby increasing grain  
545 accumulation. We also performed protein family (Pfam) domain prediction and identified ~4057  
546 families across tissue and treatment conditions with the highest number of transcripts represented  
547 by PPR repeat (2913) followed by PPR repeat family (2025) and protein kinase domain (1702)  
548 (Supplementary Table S14).

### 549 **3.8 Identification of regulatory miRNAs and SSR markers from DEGs related to Fe & Zn** 550 **homeostasis**

551 In plants, miRNAs have appeared as prime regulator of many biotic and abiotic stresses,  
552 including low micronutrient availability by modulating the expression of transporter genes  
553 associated with nutrient uptake and mobilization (Gupta *et al.*, 2014a & 2014b; Paul *et al.*, 2015;  
554 2016; Gupta *et al.*, 2020). To decode miRNAs' involvement across the tissue and treatment  
555 conditions in efficient and inefficient wheat genotypes, we identified miRNAs targeting core  
556 genes of the Met cycle, PS biosynthesis, transporters, and antioxidant pathway. Result revealed  
557 26 miRNAs targeting 14 core genes across all four pathways, while 11 genes did not show any  
558 corresponding miRNAs (Supplementary Table S15). Interestingly, the highest number of  
559 miRNAs were represented by methylthioribose-1-phosphate isomerase gene (4) followed by s-  
560 adenosylMet decarboxylase, natural resistance-associated macrophage protein and catalase, each  
561 targeted by three miRNAs (Supplementary Table S15). Likewise, the use of SSR markers in  
562 QTL mapping to understand the genetic basis of Fe & Zn accumulation in grains has immense  
563 potential to devise new breeding strategies for increasing grain micronutrient content through  
564 marker-assisted selection (Krishnappa *et al.*, 2017). SSR analysis of RNA-Seq data in the present  
565 study led us to identify 41723 SSRs, out of which 7147 transcripts were represented by over 1  
566 SSR (Supplementary Fig. S8A). Identified SSRs were predominated by mono (32%), tri (28%)  
567 and tetra (27%) nucleotide repeats (11649) (Supplementary Fig. S8A). Alike, motif prediction of  
568 these SSRs showed the abundance of T/A followed by CAG/GTC and CTG/GAC with least  
569 represented by TCA TCG/AGT AGC (Supplementary Fig. S8B).

## 570 **4. Discussion**

571 Understanding the physiological, biochemical and molecular mechanism regulating Fe & Zn  
572 uptake, transport and remobilization have great potential for improving Fe & Zn content in wheat  
573 grain. In this study, we first performed a study of the dynamic changes in different physiological  
574 parameters such as root & shoot length, chlorophyll content and leaf area of two hexaploid wheat  
575 genotypes having different grain Fe & Zn content exposed to 50% (T1) and complete withdrawal  
576 (T2) of Fe & Zn. Secondly, the biochemical parameters related to the antioxidant system, PS  
577 content and Fe & Zn content were determined in both shoot and root. Thirdly, we performed  
578 transcriptome analysis with interaction network and transcriptional module that led to identifying  
579 a core set of genes involved in Fe & Zn homeostasis. By integrating physiological and  
580 biochemical data along with co-expression & functional genome annotation and gene expression  
581 analysis, we identified four key pathways, *i.e.* Met cycle, PS biosynthesis, antioxidant and Fe &  
582 Zn transport system, significantly affected by Fe & Zn deficiency (Fig. 9). The results presented  
583 here provide a comprehensive understanding of the gene regulatory network of four critical  
584 pathways associated with Fe & Zn uptake, transport and remobilization in wheat.

#### 585 **4.1 Fe & Zn withdrawal significantly modulates the physiological and anti-oxidant** 586 **potential in wheat**

587 Previous reports have shown the adverse effects of Fe & Zn starvation on physiological traits,  
588 including root and shoot growth (Garnica *et al.*, 2018). Here, the data demonstrated significant  
589 decreases in shoot growth under both T1 and T2 conditions. Leaf exhibited chlorosis after 14  
590 days of growth in T1 and 6-7 days of treatment under T2 in both the genotypes compared to  
591 control. Iron deficiency based chlorosis of young leaves is a common symptom in plants (Santos  
592 *et al.*, 2019). Besides, micronutrients, especially Fe, are supposed to act through membrane  
593 stabilization by acting as a cofactor in several biological processes, including chlorophyll  
594 biosynthesis and photosynthesis (Ma *et al.*, 1999). The severity of physiological symptoms was  
595 more prominent in nutrient in efficient genotype PBW 502 than the efficient genotype Narmada  
596 195. A significant decrease in the total leaf area was observed for both genotypes under T1 and  
597 T2, but the decline was more pronounced for PBW 502 (51% and 49% for T1 and T2,  
598 respectively) compared to Narmada 195 (33% and 35% for T1 and T2 respectively). Similarly,  
599 both Fe & Zn concentration decreased significantly in both shoot and root parts under nutrient  
600 deficiency stress (Table 2); however, the decline was more pronounced in PBW 502 than  
601 Narmada 195. Zn content decreased more in shoot than root, showing a severe effect on Zn's

602 translocation in shoot under stress. Similarly, Impa *et al.*, 2013 reported higher Zn content in the  
603 leaf of efficient rice genotype IR55179 than sensitive genotype under stress. Several root-related  
604 processes, such as efflux of PS, proton exudation and formation of Fe plaques, may influence  
605 higher Fe & Zn uptake in Fe & Zn efficient genotypes (Impa *et al.*, 2013; Rose *et al.*, 2013).

606 Activities of SOD, CAT and GR related to the antioxidant system were undertaken in the  
607 present study. There was a significant decrease in the activity of SOD in both Narmada 195 and  
608 PBW 502 under both T1 (1.19-fold in Narmada 195; 2.17-fold in PBW 502) and T2 (3-fold in  
609 Narmada 195; 7.6-fold in PBW 502) conditions. Based on metal cofactors in the active site,  
610 SODs are of three types, *i.e.* MnSOD, Cu/ZnSOD, and FeSOD. Fe and Zn are essentially  
611 required for the activity of Cu/ZnSOD and FeSOD. Deficiency in these two elements leads to  
612 reduced expression of Cu/ZnSOD and FeSOD isoforms. Literature suggests increased SOD  
613 activity in plants grown under Fe deficiency mainly because of enhanced expression of Cu/Zn or  
614 Mn-SOD isoform (Ranieri *et al.*, 2001; Molassiotis *et al.*, 2006; Donnini *et al.*, 2011). Several  
615 other reports also showed a decrease in the activity of SOD in wheat (Cakmak *et al.*, 1997), bean  
616 (Cakmak and Marschner, 1993) and cotton (Cakmak and Marschner, 1987). Interestingly, the  
617 decreases in activity of SOD because of Fe & Zn deficiency was prominent in inefficient  
618 genotype, as observed for PBW 502 in the current study. The variation in the amounts of  
619 physiologically active Fe & Zn present in the plants can be accounted for the differential severity  
620 of deficiency symptoms despite the nearly similar concentration of Fe & Zn in leaves. Possibly,  
621 efficient genotypes contain higher amounts of Fe & Zn chelators in tissues, such as S-containing  
622 amino acids, nicotianamine and PS, which influence the mobility of Fe & Zn in plants and  
623 enhance the physiologically active Fe & Zn pool at the cellular level (Stephan *et al.*, 1994;  
624 Graham and Welch, 1996).

625 The increased CAT activity observed in efficient genotype Narmada 195 under Fe & Zn  
626 deficiency suggests that these ROS-scavenging antioxidant enzymes have a vital role in  
627 eliminating destructive oxidant species. Increased activity of CAT in response to Fe & Zn  
628 deficiency have also been reported in *Poncirus trifoliata* (Xiao *et al.*, 2010), Apple (Jin-Hua *et al.*  
629 *et al.*, 2012), rice (Kabir *et al.*, 2017) and wheat (Sharma *et al.*, 2004). The notably increased GR  
630 activity observed in Narmada 195 suggested higher efficiency in converting O<sub>2</sub> to H<sub>2</sub>O<sub>2</sub> for  
631 protecting plants against oxidative stress. The Fe & Zn deficiency triggered enhanced GR



632 activity might activate both antioxidant enzyme and ASC–GSH cycle, thus stimulating the  
633 synthesis of antioxidant metabolites. Differential expression analysis of SOD, CAT and GR  
634 during Fe & Zn withdrawal conditions exhibited a significant increase in their expression levels,  
635 which could be associated with the ROS pathway's triggering (Fig. 7B). Increased expression of  
636 CAT and GR was correlated with higher activities of these enzymes. However, increased  
637 expression of the SOD gene could not lead to enhanced enzyme activity because Fe and Zn are  
638 required for the enzyme's efficient functioning by acting as a cofactor.

639 Variations have also been reported for antioxidants associated with differential Fe & Zn  
640 efficiency in contrasting genotypes for other plants (Frei *et al.*, 2010; Santos, 2019). Compared  
641 to Narmada 195, we observed a substantial increase in MDA content in PBW 502 because of  
642 Fe/Zn withdrawal intolerance. An increase in MDA content shows the severity of stress  
643 experienced by any plant owing to its negative effect on the cell membranes (Chakraborty and  
644 Pradhan, 2012). The increase in MDA level in PBW 502 could be because of an overproduction  
645 of ROS *vis-à-vis* to an inadequate capacity to detoxify it. Scavenging of ROS for restoring redox  
646 metabolism, preserving cellular turgor, and structures actively function during abiotic stress in  
647 plants (Mittler, 2006). Therefore, inefficient wheat genotype PBW 502 could not activate Fe &  
648 Zn uptake mechanism as competently as efficient wheat genotype Narmada 195 and, therefore,  
649 suffers from more significant oxidative damage with a lower antioxidative response.

#### 650 **4.2 Fe & Zn withdrawal significantly modulates genes associated with the Met cycle**

651 SAM synthesized from Met by SAM synthase serves as a precursor for the biosynthesis of  
652 polyamines, PSs and ethylene (Mori and Nishizawa, 1987). It is a metabolically very essential  
653 compound by acting as a methyl group donor in several biochemical reactions. Constant  
654 recycling of various metabolites of the Met salvage pathway is critical to maintaining the  
655 physiological level of Met. The Met cycle actively recycles Met to meet the augmented demand  
656 for PS biosynthesis (Ma *et al.* 1995). Amongst the enzymes associated with the Met cycle,  
657 formate dehydrogenase (FDH; Suzuki *et al.*, 1998), Fe-deficiency-induced protein 1 (IDI1;  
658 Yamaguchi *et al.*, 2000), and adenine phosphoribosyltransferase (Itai *et al.*, 2000) are up-  
659 regulated because of Fe deficiency. Other Met cycle enzymes are also transcriptionally up-  
660 regulated under Fe & Zn deficient conditions (Kobayashi *et al.*, 2014; Gupta *et al.*, 2020). In our



661 study, we identified ten genes associated with the Met salvage pathway (Fig. 9). Expression  
662 analysis showed up-regulation of almost all the genes in both the genotypes with the higher up-  
663 regulation in Fe & Zn efficient Narmada 195 root under T2 condition (Fig. 4A & 9). Increased  
664 up-regulation of most of the Met salvage pathway genes ensures a constant supply of various  
665 metabolites for the biosynthesis of PSs under Fe & Zn deficiency condition. These results imply  
666 that the Met salvage pathway's activation might be one of the mechanisms for enhanced  
667 accumulation of PSs, leading to efficient uptake of Fe & Zn in efficient wheat genotype Narmada  
668 195 even in Fe & Zn withdrawal conditions compared to inefficient PBW502 genotype.  
669 Furthermore, the Met salvage pathway genes have been shown to be contributed by different  
670 sub-genomes (Fig. 3A). This kind of sub-genomic distribution of the Met cycle's essential genes  
671 suggests the importance of all genome under Fe & Zn withdrawal conditions. Based on these  
672 results, future work should be aimed at deciphering these genes' molecular function using  
673 approaches like CRISPR/Cas9, TILLING or heterologous system to gain more insight into their  
674 role during Fe & Zn deficiency.

#### 675 **4.3 Phytosiderophore biosynthesis is negatively regulated by Fe & Zn withdrawal**

676 Biosynthesis and release of PSs are very critical in strategy II mode of Fe & Zn uptake and  
677 translocation from rhizosphere to the grains (Fig. 9). Increased PS release from roots of  
678 graminaceous species exposed to micronutrient deficiency has been reported by several workers,  
679 including Fe deficiency (Khobra & Singh, 2019; Divte *et al.*, 2019) and Zn deficiency (Khobra  
680 & Singh, 2019; Ahmadzadeh and Khoshgoftarmanesh, 2019). However, there is limited  
681 information about the combined effect of Fe & Zn withdrawal in root and shoot  
682 comprehensively. The varying degree of PS accumulation in response to Fe & Zn deficiency is  
683 attributed to environmental conditions, physiological performance, genetic background and  
684 composition of nutrient medium (Arora *et al.*, 2019; Niyigaba *et al.*, 2019). In this investigation,  
685 efficient genotype Narmada 195 showed a higher accumulation of PS under T2 condition, *i.e.*  
686 complete Fe & Zn withdrawal, compared to inefficient PBW502 wheat genotype (Table 3). The  
687 differences in PS accumulation can be correlated with the differential expression of genes related  
688 to PS biosynthesis. In this investigation, the RT-qPCR expression analysis suggested up-  
689 regulation of genes related to PS biosyntheses such as NAS, NAAT, DMAS and DMAD, in both  
690 the genotypes, *i.e.* Narmada 195 and PBW502, under both treatment conditions, *i.e.* T1 and T2  
691 (Fig. 4B & 9). However, compared to PBW 502, up-regulation of these genes was higher in

692 Narmada 195 that might be one reason for more PS biosynthesis and release leading to efficient  
693 uptake and transportation of Fe & Zn. Various other reports have also shown that the PS  
694 biosynthesis genes are up-regulated under Fe and Zn (Ahmadzadeh and Khoshgoftarmanesh,  
695 2019; Gupta *et al.*, 2020) deficiency conditions in different crops, including rice, wheat, barley  
696 and oats. Binding of Fe & Zn with PS shares similar biochemical confirmation and a similar  
697 regulatory mechanism of biosynthesis and/or release of PS under Zn & Fe deficiency (Rengel  
698 and Romheld, 2000). However, different divalent cations such as nickel have also been reported  
699 to compete with Fe & Zn in binding with available PS suggesting a series of regulatory cross-  
700 talk. Nickel deficiency significantly enhanced shoot Fe & Zn concentrations in wheat, while it  
701 decreased shoot Fe & Zn concentrations in triticale (Ahmadzadeh and Khoshgoftarmanesh,  
702 2019). Therefore, it is imperative to revisit the binding kinetics of different divalent cations,  
703 including Fe & Zn, with the available PS to understand their uptake and transportation  
704 mechanism better. Higher accumulation of PS in Narmada 195 shows better Fe & Zn uptake and  
705 transportation even under T2 condition. Varietal differences in PS accumulation *vis-à-vis* grain  
706 Fe & Zn content can be utilized to decipher the molecular mechanism of Fe & Zn accumulation.

#### 707 **4.4 Transporters play a pivotal role to cope up with the Fe & Zn deficiency**

708 Metal ion transporters play a crucial role in modulating different metal ions' cellular  
709 homeostasis, including Fe & Zn. To maintain the precise metallic homeostasis in plants, several  
710 gene families of metal ion transport such as cation diffusion facilitator (CDF) family, NRAMP,  
711 MDRP, VIT, ZIP, and P-type ATPase take part in the uptake and transport of metal ions by  
712 plants (Zhang *et al.*, 2013; Connorton *et al.*, 2017a). SLC30 (ZnTs) and SLC39 (ZIP)  
713 transporters (Fig. 9), identified in our study, have been widely reported as two major Zn  
714 transporters of the CDF family regulating the cellular Zn homeostasis in mammals (Cotrim *et al.*,  
715 2019). Both the transporters regulate cellular Zn homeostasis by trafficking the Zn in the  
716 opposite direction, *i.e.* SLC30 mediates Zn efflux out of the cytosol into the extracellular space  
717 or intracellular compartments while SLC39 imports Zn into the cytosol from extracellular space  
718 or intracellular compartments (Kimura and Kambe, 2016). While SLC39 is ubiquitously  
719 expressed in mammalian tissue (Gaither and Eide, 2001), the expression of SLC30 vary greatly  
720 across tissue and developmental condition (Schweigel-Röntgen, 2014). We, for the first time,  
721 identified SLC30 and SLC39 associated with Zn homeostasis in wheat. Differential expression  
722 analysis also exhibited higher expression of these two transporters under T2 condition in both the

723 tissues, *i.e.* root and shoot in Narmada 195 compared to PBW502, showing their possible  
724 association with efficient mobilization of Zn in Narmada 195. Our *in-silico* analysis of SLC30  
725 and SLC39 showed six transmembrane helices (Supplementary table S7), a typical feature of  
726 these proteins (Huang and Tapaamorndech, 2013). Further investigations are required in other  
727 model plant system for comprehensive functional characterization, including their possible  
728 competition/interaction between Fe & Zn. We also identified an SLC25 transporter localized at  
729 the mitochondrial membrane for iron transport (Supplementary table S7). On the other hand,  
730 ZTP29, another ZIP initially identified on endoplasmic reticulum (ER) in *Arabidopsis* under salt  
731 stress (Wang *et al.*, 2010), is homologous to *TaZIP16* in wheat (Evens *et al.*, 2017). Zn  
732 deficiency induces the expression of *TaZIP16* in wheat (Evens *et al.*, 2017), which supports our  
733 results of enhanced expression of ZTP29 in both the genotypes with higher expression in  
734 Narmada195 genotype under both Fe & Zn withdrawal condition. Members of ZIPs have  
735 emerged as a critical membrane transporter family in Zn's journey from soil to seed (Palmgren *et*  
736 *al.*, 2008). Zn deficiency-induced expression of *TaZIP16* and ZTP29 might be involved in  
737 balancing the Zn status of mitochondria even under Zn withdrawal condition. Further work on  
738 cross-talk of ZTP29 expression in response to both Fe & Zn in different tissues and  
739 developmental condition could enhance our present understanding of Fe & Zn metabolism in  
740 plants.

741 NRAMP family is another widely characterized transport protein ranging from bacteria  
742 to human for their crucial role during transport of various divalent cations, including Fe & Zn.  
743 (Garrick *et al.*, 2006). Different members of the NRAMP family have shown differential  
744 expression behaviour in response to Fe & Zn deficiency conditions in various crops, including  
745 rice (Peris-Peris *et al.*, 2017), sorghum and maize (Wairich *et al.*, 2019), wheat (Gupta *et al.*,  
746 2020), suggesting their crucial role in maintaining cellular Fe & Zn homeostasis. We found a  
747 higher expression of NRAMP transporter in Narmada 195 in both root and shoot compared to  
748 PBW 502 (Fig. 9). Despite these initial results, comprehensive work on genome-wide  
749 identification and characterization of all the NRAMP family members would enhance our current  
750 understanding of its role during the transport of Fe, Zn and other divalent cations. As a part of a  
751 safe Fe storage strategy, vacuolar sequestration is another essential mechanism that regulates Fe  
752 homeostasis. VITs play a central role in sustaining the optimal physiological range of Fe  
753 (Aggarwal *et al.*, 2018). The expression pattern of VIT1 and VIT2 differed in rice and wheat in

754 response to varying level of Fe & Zn (Sharma *et al.*, 2020). *OsVIT1* remained unaltered to post  
755 seven days of Fe starvation, while *OsVIT2* showed significant down-regulation (Zhang *et al.*,  
756 2012) in rice. Hexaploid wheat genome has two *VIT* genes, *i.e.* *TaVIT1* and *TaVIT2*, and have  
757 differential expression pattern across the tissues (Connorton *et al.*, 2017b). Recently, Sharma *et*  
758 *al.* (2020) have shown up-regulation of vacuolar-iron transporters like (VTL) genes in wheat  
759 under Zn, Mn and Cu deficiency. In contrast, our result showed up-regulation of *VIT* in root and  
760 shoot of both the genotypes under T1 and T2 condition. This type of differences in results could  
761 be attributed to the difference in species, genotype, treatment condition and duration of  
762 treatment, age of plants, *etc.*

#### 763 **4.5 Multiple transcription factors are involved in Fe & Zn uptake and transportation in** 764 **wheat**

765 Over the past 20 years, significant efforts were made in identifying numerous transcriptional  
766 regulators of Fe & Zn in plants (Connorton *et al.*, 2017a). Several TF families, including bHLH  
767 NAC, C2H2, MYB, WRKY and bZIP (Assuncao *et al.*, 2010; Kim *et al.*, 2012), have widely  
768 been characterized for their crucial role in nutrient uptake and homeostasis in model plants such  
769 as *Arabidopsis* and rice. In the recent past, the transcriptomic approach has emerged as one of the  
770 critical methods to identify and characterize the TF families in wheat exposed to either Fe (Kaur  
771 *et al.*, 2019; Wang *et al.*, 2019), Zn (Wang *et al.*, 2017) or Fe & Zn together (Mishra *et al.*, 2019;  
772 Gupta *et al.*, 2020). Taken together, our result also showed that bHLH, NAC, MYB, WRKY  
773 were among the top TF families showing induced expression in response to Fe & Zn withdrawal  
774 in both the wheat genotypes (Fig. 6; Supplementary Table S12). Similarly, bZIP was also one of  
775 the highly induced TF families detected in the current study. Higher accumulation of two  
776 significant Zn deficiency-induced TF, such as bZIP19 and bZIP23, was associated with up-  
777 regulation of the essential PS biosynthesis gene *NAS* and ZIP members transporter (Clemens *et*  
778 *al.*, 2013; Inaba *et al.*, 2015). Despite significant progress in understanding the molecular  
779 network and cross-talk during Fe & Zn homeostasis, future research should be directed towards  
780 using the reverse genetic and functional complementation test in the model organism.

#### 781 **4.6 Post-transcriptional regulation plays a critical role in regulating core genes of Fe & Zn** 782 **homeostasis**

783 Post-transcriptional regulators such as miRNA play a central role in regulating the gene  
784 expression associated with various biotic, abiotic and nutrient homeostasis in plants (Gupta *et al.*,  
785 2014a; 2014b; Paul *et al.*, 2015). During the last decade, several reports have witnessed  
786 miRNAs' involvement in maintaining the cellular Fe & Zn homeostasis in various plants (Paul *et al.*  
787 *et al.*, 2016; Zeng *et al.*, 2019; Gupta *et al.*, 2020). However, reports on Fe & Zn deficiency's  
788 combined effect on miRNA cross-talk, especially in wheat, is limited (Gupta *et al.*, 2020). In the  
789 current study, we identified 26 miRNAs targeting four critical pathways, *i.e.* Met cycle, PS  
790 biosynthesis, transport and antioxidant system (Supplementary Table S15). As in our previous  
791 report (Gupta *et al.*, 2020), these miRNAs might play a critical role in regulating the transcript  
792 abundance of the cellular Fe & Zn homeostasis pathway, which could be decisive in controlling  
793 the level of grain Fe & Zn in wheat. Further work on Spatio-temporal expression profiling of  
794 miRNAs and their corresponding target genes and their functional validation in response to Fe &  
795 Zn withdrawal needs to be performed either in wheat or any model plants. This will help develop  
796 the miRNA-based gene regulatory network to better understand the molecular mechanisms of Fe  
797 & Zn homeostasis at the level of post-transcription.

## 798 **5. Conclusion**

799 Combined analysis of physiological, biochemical and molecular parameters in two wheat  
800 genotypes, *i.e.* Narmada 195 and PBW 502, under both T1 and T2 conditions showed the  
801 adaptive superiority of Narmada 195 over PBW 502 for efficient uptake and mobilization of Fe  
802 & Zn from rhizosphere to grains. An increase in the antioxidant capacity and less severity of Fe  
803 & Zn deficiency symptoms in Narmada 195 signifies that high antioxidant response plays a  
804 crucial role in Fe-Zn deficiency tolerance in Narmada 195. Moreover, PBW 502 could suffer  
805 more because of an overproduction of ROS and, at the same time, an inadequate capacity to  
806 detoxify it. Higher expression of genes related to the Met cycle, PS biosynthesis, antioxidant and  
807 transport system in Narmada 195 indicates better Fe & Zn uptake and transportation even under  
808 T2 condition (Fig. 9). The study has contributed significantly to our current understanding of  
809 physiological, biochemical and molecular mechanisms of Fe & Zn uptake and translocation  
810 under the varying level of Fe & Zn in wheat genotypes. This will help design strategies to  
811 improve Fe and Zn content in wheat under deficient conditions to boost grain nutritional quality  
812 through Fe & Zn bio-fortification programmes.

813 **Supplementary data**

814 **Fig S1:** Flowchart giving an outline of the hydroponic experiment.

815 **Fig. S2:**Venn diagram showing the numbers of unique and overlapping differentially expressed  
816 genes in root and shoot.

817 **Fig. S3:**Volcano plots showing the expression levels of the genes

818 **Fig. S4:** (A) Pie chart showing the e-value distribution plot (B) Graph showing the percentage  
819 similarity distribution.

820 **Fig. S5a:** Heat map showing the expression pattern of top-up and down-regulated genes in  
821 efficient Narmada 195 root.

822 **Fig.S5b:** Heat map showing the expression pattern of top-up and down-regulated genes in  
823 efficient Narmada 195 shoot.

824 **Fig. S5c:** Heat map showing the expression pattern of top-up and down-regulated genes in  
825 inefficient PBW502 root.

826 **Fig.S5d:** Heat map showing the expression pattern of top-up and down-regulated genes in  
827 inefficient PBW502 shoot.

828 **Fig. S6:** Scatter plot represents fold changes in gene expressions measured by RNA-seq and an  
829 RT-qPCR assay of core genes.

830 **Fig. S7:** Heat map of core genes associated with four key pathways.

831 **Fig. S8:** Identification of (A) SSRs and their (B) motif prediction in transcriptomic data.

832 **Table S1:** List of primers used for qPCR in the present study.

833 **Table S2:** Summary of read statistics of RNA-Seq libraries.

834 **Table S3:** Assembly statistics of RNA-Seq libraries.

835 **Table S4:** Gene Ontology (GO) analysis of DEGs in response to Fe & Zn withdrawal condition

836 **Table S5:** List of enriched KEGG pathway identified using KAAS server.

837 **Table S6:** Statistics of species distribution of annotated DEGs.

838 **Table S7:** *In-silico* analysis of core genes for various parameters at the protein level.

839 **Table S8:** List of DEGs in response to Fe & Zn withdrawal in the root of efficient wheat  
840 genotype Narmada 195.

841 **Table S9:** List of DEGs in response to Fe & Zn withdrawal in the shoot of efficient wheat  
842 genotype Narmada 195.

843 **Table S10:** List of DEGs in response to Fe & Zn withdrawal in the root of inefficient wheat  
844 genotype PBW502.

845 **Table S11:** List of DEGs in response to Fe & Zn withdrawal in the shoot of inefficient wheat  
846 genotype PBW502.

847 **Table S12:** Expression profiles of genes/gene families involved in the Met cycle, PS  
848 biosynthesis, Fe & Zn transport system and antioxidant pathways.

849 **Table S13:** List of TF families enriched across tissues, genotypes and treatment conditions.

850 **Table S14:** List of protein families (Pfam) enriched across tissues, genotypes and treatment  
851 conditions.

852 **Table S15:** Identification of the corresponding miRNA of core genes during Fe & Zn  
853 homeostasis.

854

855

856

857

858

859

860

861

862

863

864

865

866

867

868

869



870 **Acknowledgements**

871 Authors are thankful to the Indian Council of Agricultural Research, Department of Agricultural  
872 Research and Education, Govt. of India for providing financial help under grant no. 1006422,  
873 institutional project (CRSIIWBSIL 201500900190) and Department of Biotechnology, Govt.  
874 of India under the grant BT/NABI-Flagship/2018. We also acknowledge Sendhil R and Vijay  
875 Singh's technical help in statistical analysis and growing the seedlings, respectively.

876 **Author contributions**

877 OPG, VP and SR conceived the program, designed the experiment; RS, TK, AS, VKM, OPG,  
878 VP and SN performed the experiments; OPG analyzed the transcriptome data, OPG, RS, VP and  
879 AS analysed physiological and biochemical data; OPG prepared the figures; OPG and VP wrote  
880 the manuscript; SR and GP supervised the writing; All authors read and approved the final  
881 manuscript.

882 **Declaration of competing interest**

883 The authors declare that they have no known competing financial interests or personal  
884 relationships that could have appeared to influence the work reported in this paper.

885

886

887

888

889

890

891

892

893

894

895

## Reference

1. **Aggarwal S, Kumar A, Bhati KK, et al.** 2018. RNAi-mediated downregulation of inositol pentakisphosphate kinase (IPK1) in wheat grains decreases phytic acid levels and increases Fe & Zn accumulation. *Frontiers in Plant Science*, 9, 259.
2. **Ahmadzadeh F, Khoshgoftarmanesh AH.** 2019. Release of phytosiderophores from roots of wheat and triticale under nickel-deficient conditions. *Journal of Plant Nutrition and Soil Science* 182, 708–714.
3. **Altschul SF, Gish W, Miller W, et al.** 1990. Basic local alignment search tool. *Journal of Molecular Biology* 215, 403–410.
4. **Anders S, Huber W.** 2010. Differential expression analysis for sequence count data. *Genome Biology* 11, R106.
5. **Arora S, Cheema J, Poland J, et al.** 2019. Genome-wide association mapping of grain micronutrients concentration in *Aegilops tauschii*. *Frontiers in plant science* 10, 54.
6. **Assuncao AG, Herrero E, Lin YF, et al.** 2010. *Arabidopsis thaliana* transcription factors bZIP19 and bZIP23 regulate the adaptation to zinc deficiency. *Proceedings of the National Academy of Sciences* 107, 10296–10301.
7. **Bandyopadhyay T, Mehra P, Hairat S, et al.** 2017. Morpho-physiological and transcriptome profiling reveal novel zinc deficiency-responsive genes in rice. *Functional & Integrative Genomics* 17, 565–581.
8. **Bankevich A, Nurk S, Antipov D, et al.** 2012. SPAdes: a new genome assembly algorithm and its applications to single-cell sequencing. *Journal of Computational Biology* 19(5), 455–477.
9. **Bashir K, Hanada K, Shimizu M, et al.** 2014. Transcriptomic analysis of rice in response to iron deficiency and excess. *Rice* 7, 18.
10. **Bolger AM, Lohse M, Usadel B.** 2014. Trimmomatic: A flexible trimmer for illumina sequence data. *Bioinformatics* 30(15), 2114-2120.
11. **Borrill P, Harrington SA, Uauy C.** 2018. Applying the latest advances in genomics and phenomics for trait discovery in polyploid wheat. *The Plant Journal* 97, 56-72.
12. **Cakmak I, Marschner H.** 1993. Effect of Zn nutritional status on activities of superoxide radical and hydrogen peroxide scavenging enzymes in bean leaves. *Plant and Soil* 155/156, 127-130.
13. **Cakmak I, Ekiz H, Yilmaz A, et al.** 1997. Differential response of rye, triticale, bread and durum wheats to zinc deficiency in calcareous soils. *Plant Soil* 188:1-10.
14. **Cakmak I, Marschner H.** 1987. Mechanism of phosphorus induced zinc deficiency in cotton. III. Changes in physiological availability of zinc in plants. *Physiologia Plantarum* 70, 13-20.

15. **Cakmak I, Gulut KY, Marschner H, et al.** 1994. Effect of zinc and iron deficiency on phytosiderophore release in wheat genotypes differing in zinc efficiency. *Journal of Plant Nutrition* 17, 1–17.
16. **Cotrim CA, Jarrott RJ, Martin JL, et al.** 2019. A structural overview of the zinc transporters in the cation diffusion facilitator family. *Acta Crystallographica D75*, 357–367.
17. **Chakraborty U, Pradhan B.** 2012. Drought stress-induced oxidative stress and antioxidative responses in four wheat (*Triticum aestivum* L.) varieties. *Archives of Agronomy and Soil Science* 58, 617–630.
18. **Clemens S, Deinlein U, Ahmadi H. et al.** 2013. Nicotianamine is a major player in plant Zn homeostasis. *Biometals* 26, 623–632.
19. **Connorton JM, Balk J, Rodríguez-Celma J.** 2017a. Iron homeostasis in plants-a brief overview. *Metallomics* 9, 813–823.
20. **Connorton JM, Jones ER, Rodríguez-Ramiro I, et al.** 2017b. Wheat vacuolar iron transporter TaVIT2 transports Fe and Mn and is effective for biofortification. *Plant Physiology* 174, 2434–2444.
21. **Deinlein U, Weber M, Schmidt H, et al.** 2012. Elevated nicotianamine levels in *Arabidopsis halleri* roots play a key role in zinc hyperaccumulation. *Plant Cell* 24, 708-723.
22. **Divte P, Yadav P, Jain PK, et al.** 2019. Ethylene regulation of root growth and phytosiderophore biosynthesis determines iron deficiency tolerance in wheat (*Triticum* spp.). *Environmental and Experimental Botany* 162, 1-13.
23. **Emanuelsson O, Nielsen H, Brunak S, et al.** 2000. Predicting subcellular localization of proteins based on their N-terminal amino acid sequence. *Journal of Molecular Biology* 300, 1005-1016.
24. **Evens NP, Buchner P, Williams LE, et al.** 2017. The role of ZIP transporters and group F bZIP transcription factors in the Zn-deficiency response of wheat (*Triticuma estivum*). *Plant Journal* 92, 291–304.
25. **Finn RD, Clements J, Arndt W, et al.** 2015. HMMER web server: 2015 update. *Nucleic Acids Research* 43, W30–W38.
26. **Finn RD, Coghill P, Eberhardt RY, et al.** 2016. The Pfam protein families database: towards a more sustainable future. *Nucleic Acids Research* 44, D279–D285.
27. **KJ, Schmittgen TD.** 2001. Analysis of relative gene expression data using real-time quantitative PCR and the 2(-Delta Delta C(T)) Method. *Methods*, 25(4), 402-8.
28. **Frei M, Wang Y, Ismail AM, et al.** 2010. Biochemical factors conferring shoot tolerance to oxidative stress in rice grown in low zinc soil. *Functional Plant Biology* 37, 74-84.

29. **Fu L, Niu B, Zhu Z, et al.** 2012. CD-HIT: accelerated for clustering the next-generation sequencing data. *Bioinformatics* 28(23), 3150-3152.
30. **Gaither LA, Eide DJ.** 2001. Eukaryotic zinc transporters and their regulation. *Biometals* 14(3-4) 251-270.
31. **Garnica M, Bacaicoa E, Mora V, et al.** 2018. Shoot iron status and auxin are involved in iron deficiency-induced phytosiderophores release in wheat. *BMC Plant Biology* 18, 105.
32. **Garrick MD, Singleton ST, Vargas F, et al.** 2006. DMT1: which metals does it transport?. *Biological Research* 39, 79-85.
33. **Graham RD, Welch RM.** 1996. Breeding for staple food crops with high micronutrient density. Working Papers on Agricultural Strategies for Micro-nutrients, No.3. International Food Policy Research Institute, Washington, D.C.
34. **Gupta OP, Sharma P, Gupta RK, et al.** 2014b. Current status on role of miRNAs during plant-fungus interaction. *Physiological and Molecular Plant Pathology* 85, 1-7.
35. **Gupta OP, Pandey V, Saini R, et al.** 2020. Identifying transcripts associated with efficient transport and accumulation of Fe & Zn in hexaploid wheat (*T. aestivum* L.). *Journal of Biotechnology* 316, 46–55.
36. **Gupta OP, Sharma P, Gupta RK, et al.** 2014a. MicroRNA mediated regulation of metal toxicity in plants: present status and future perspectives. *Plant Molecular Biology* 84, 1-18.
37. **Hansen NC, Jolley VD, Berg WA, et al.** 1996. Phytosiderophore release related to susceptibility of wheat to iron deficiency. *Crop Science* 36, 1473-1476.
38. **Hindt MN, Guerinot ML.** 2012. Getting a sense for signals: regulation of the plant iron deficiency response. *Biochimica et Biophysica Acta* 1823, 1521-1530.
39. **Hotz C, Brown KH.** 2004. Assessment of the risk of zinc deficiency in populations and options for its control. *Food and Nutritional Bulletin* 25, 94-204.
40. **Huang L, Tepasamordech S.** 2013. The SLC30 family of zinc transporters-A review of current understanding of their biological and pathophysiological roles. *Molecular Aspects of Medicine* 34, 548-560.
41. **Impa SM, Gramlich A, Tandy S, et al.** 2013. Internal Zn allocation influences Zn deficiency tolerance and grain Zn loading in rice (*Oryza sativa* L.). *Frontiers in Plant Science* 4, 534.
42. **Inaba S, Kurata R, Kobayashi M, et al.** 2015. Identification of putative target genes of bZIP19, a transcription factor essential for *Arabidopsis* adaptation to Zn deficiency in roots. *Plant Journal* 84(2), 323-34.

43. **Jin-Hua T, Xiu-Shan T, Fei L, et al. 2012.** Effects of zinc deficiency stress on the antioxidative capability and plant hormone level of the different apple rootstocks. *Acta Horticulturae Sinica* 39, 1429-1436.
44. **Kabir AH, Rahman MM, Haider SA, et al. 2015.** Mechanisms associated with differential tolerance to Fe deficiency in okra (*Abelmoschus esculentus* Moench). *Environmental and Experimental Botany* 112, 16–26.
45. **Kabir SR, Rahman MM, Tasnim S, et al. 2016.** Purification and characterization of a novel chitinase from *Trichosanthes dioica* seed with antifungal activity. *International Journal of Biological Macromolecules* 84, 62-68.
46. **Kabir AH, Hossain MM, Khatun MA, et al. 2017.** Biochemical and molecular mechanisms associated with Zn deficiency tolerance and signaling in rice (*Oryza sativa* L.). *Journal of Plant Interactions*, 12(1), 447-456.
47. **Kaur G, Shukla V, Kumar A, et al. 2019.** Integrative analysis of hexaploid wheat roots identifies signature components during iron starvation. *Journal of experimental botany*, 70(21), 6141-6161.
48. **Takagi S. 1976.** Naturally occurring iron-chelating compounds in oat- and rice-root washing. I. Activity measurement and preliminary characterization. *Soil Science and Plant Nutrition* 22, 423-433.
49. **Khobra R, Singh B. 2018.** Phytosiderophore release in relation to multiple micronutrient metal deficiency in wheat. *Journal of Plant Nutrition* 41(6), 679-688.
50. **Kim MJ, Ruzicka D, Shin R, et al. 2012.** The *Arabidopsis* AP2/ERF transcription factor RAP2.11 modulates plant response to low potassium conditions. *Molecular Plant* 5, 1042-1057.
51. **Kimura T, Kambe T. 2016.** The Functions of Metallothionein and ZIP and ZnT Transporters: An Overview and Perspective. *International Journal of Molecular Science* 17(3), 336.
52. **Aebi H, Lester P. 1984.** Catalase in vitro. *Methods Enzymology* 105, 121-126.
53. **Beyer WF, Fridovich I. 1987.** Assaying for superoxide dismutase activity: some large consequences of minor changes in conditions. *Analytical Biochemistry* 161, 559-566.
54. **Smith IK, Vierheller TL, Thorne CA. 1988.** Assay of glutathione reductase in crude tissue homogenates using 5,5'-dithiobis (2-nitrobenzoic acid). *Analytical Biochemistry* 175, 408-413.
55. **Velikova V, Yordanov I, Edreva A. 2000.** Oxidative stress and some antioxidant systems in acid rain-treated bean plants: protective role of exogenous polyamines. *Plant Science* 151, 59-66.
56. **Itai R, Suzuki K, Yamaguchi H, et al. 2000.** Induced activity of adenine phosphoribosyltransferase (APRT) in iron-deficient barley roots: a possible role for phytosiderophore production. *Journal of Experimental Botany* 51(348), 1179-1188.
57. **Kobayashi T, Itai RN, Nishizawa NK. 2014.** Iron deficiency responses in rice roots. *Rice* 7, 27.

58. **Kobayashi T, Nishizawa NK.** 2012. Iron uptake, translocation, and regulation in higher plants. *Annual Review of Plant Biology* 63, 131-152.
59. **Kobayashi T, Ogo Y, Itai RN, et al.** 2007. The transcription factor IDEF1 regulates the response to and tolerance of iron deficiency in plants. *Proceedings of National Academy of Sciences, USA* 104, 19150-19155.
60. **Brand-Williams W, Cuvelier ME, Berset C.** 1995. Use of a free-radical method to evaluate antioxidant activity. *LWT-Food Science and Technology* 28(1), 25-30.
61. **Kosugi H, Kikugawa K.** 1985. Thiobarbituric acid reaction of aldehydes and oxidized lipids in glacial acetic acid. *Lipid* 20, 915-921.
62. **Krishnappa G, Singh AM, Chaudhary S, et al.** (2017) Molecular mapping of the grain iron and zinc concentration, protein content and thousand kernel weight in wheat (*Triticum aestivum* L.). *PLoS ONE* 12(4), e0174972.
63. **Langmead B, Salzberg SL.** 2012. Fast gapped-read alignment with Bowtie 2. *Nature Methods* 9, 357–359.
64. **Li Y, Wang N, Zhao F, et al.** 2014. Changes in the transcriptomic profiles of maize roots in response to iron-deficiency stress. *Plant Molecular Biology* 85, 349-363.
65. **Murray CJL, Lopez AD.** 2013. Measuring the global burden of disease. *The New England Journal of Medicine* 369(5), 448-457.
66. **Long TA, Tsukagoshi H, Busch W, et al.** 2010. The bHLH transcription factor POPEYE regulates response to iron deficiency in *Arabidopsis* roots. *Plant Cell* 22, 2219-2236.
67. **Ma JF, Shinada T, Matsuda C, et al.** 1995. Biosynthesis of phytosiderophores, mugineic acids, associated with Met cycling. *Journal of Biological Chemistry* 270, 16549-16554.
68. **Ma JF, Taketa S, Chang YC, et al.** 1999. Biosynthesis of phytosiderophores in several Triticeae species with different genomes. *Journal of Experimental Botany* 50(334), 723-726.
69. **Mallikarjuna, MG, Thirunavukkarasu N, Sharma R, et al.** 2020. Comparative transcriptome analysis of iron and zinc deficiency in maize (*Zea mays* L.). *Plants* 9(12), 1812.
70. **Mensor LL, Menezes FS, Leitao GG, et al.** 2001. Screening of Brazilian plant extracts for antioxidant activity by the use of DPPH free radical method. *Phytotherapy Research* 15, 127-130.
71. **Mishra VK, Gupta S, Chand R, et al.** 2019. Comparative transcriptomic profiling of high-and low-grain Zinc and iron containing indian wheat genotypes. *Current Plant Biology* (18), 100-105.
72. **Mittler R.** 2006. Abiotic stress, the field environment and stress combination. *Trends in Plant Science* 11, 15-19.
73. **Mori S, Nishizawa N.** 1987. Met as a dominant precursor of phytosiderophores in Gramineae plants. *Plant Cell Physiology* 28, 1081-1092.



74. **Niyigaba E, Twizerimana A, Mugenzi I, et al.** 2019. Winter wheat grain quality, zinc and iron concentration affected by a combined foliar spray of zinc and iron fertilizers. *Agronomy* 9(5), 250.
75. **Ogo Y, Itai NR, Nakanishi H, et al.** 2007. The rice bHLH protein OsIRO2 is an essential regulator of the genes involved in Fe uptake under Fe-deficient conditions. *The Plant Journal* 51, 366-377.
76. **Palmgren MG, Clemens S, Williams LE, et al.** 2008. Zinc biofortification of cereals: problems and solutions. *Trends in Plant Science* 13, 464-473.
77. **Paul S, Datta SK and Datta K.** 2015. miRNA regulation of nutrient homeostasis in plants. *Frontiers in Plant Science* 5, 588.
78. **Paul S, Gayen D, Datta SK, et al.** 2016. Analysis of high iron rice lines reveals new miRNAs that target iron transporters in roots. *Journal of Experimental Botany* 67, 5811-5824.
79. **Peris-Peris C, Serra-Cardona A, Sanchez-Sanuy F, et al.** 2017. Two NRAMP6 isoforms function as iron and manganese transporters and contribute to disease resistance in rice. *Molecular Plant-Microbe Interactions* 30, 385-398.
80. **Quinet M, Vromman D, Clippe A, et al.** 2012. Combined transcriptomic and physiological approaches reveal strong differences between short- and long-term response of rice (*Oryza sativa*) to iron toxicity. *Plant, Cell & Environment* 35, 1837-1859.
81. **Rengel Z, Romheld V.** 2000. Root exudation and Fe uptake and transport in wheat genotypes differing in tolerance to Zn deficiency. *Plant and Soil* 222, 25-34.
82. **Rengel Z, Romheld V, Marschner H.** 1998. Uptake of zinc and iron by wheat genotypes differing in tolerance to zinc deficiency. *Journal of Plant Physiology* 152, 433-438.
83. **Rose TJ, Impa SM, Rose MT, et al.** 2013. Enhancing phosphorous and zinc acquisition efficiency in rice: a critical review of root traits and their potential utility in rice breeding. *Annals of Botany* 112, 331-345.
84. **Rout GR, Sahoo S.** 2015. Role of iron in plant growth and metabolism. *Reviews in Agricultural Science* 3, 1-24.
85. **Santos-Sánchez NF, Salas-Coronado R, Villanueva-Cañongo C, et al.** 2019. Antioxidant Compounds and Their Antioxidant Mechanism, *Antioxidants*, Emad Shalaby, IntechOpen, DOI: 10.5772/intechopen.85270.
86. **Schmidt W, Tittel J, Schikora A.** 2000. Role of hormones in the induction of iron deficiency responses in Arabidopsis roots. *Plant Physiology* 122, 1109-1118.
87. **Schweigel-Rontgen M.** 2014. The families of zinc (SLC30 and SLC39) and copper (SLC31) transporters. *Current Topics in Membranes* 73, 321-355.
88. **Sharma S, Kaur G, Kumar A, et al.** 2020. Gene expression pattern of vacuolar-iron transporter like (VTL) genes in hexaploid wheat during metal stress. *Plants* 9, 229.

89. **Sharma PN, Kumar P, Tewari RK.** 2004. Early signs of oxidative stress in wheat plants subjected to zinc deficiency. *Journal of Plant Nutrition*, 27(3), 451-463.
90. **Singh D, Geat N, Rajawat MVS, et al.** 2018. Prospecting endophytes from different Fe or Zn accumulating wheat genotypes for their influence as inoculants on plant growth, yield, and micronutrient content. *Annals of Microbiology* 68(12), 815-833.
91. **Sperotto RA, Vasconcelos MW, Grusak MA, et al.** 2012. Effects of different Fe supplies on mineral partitioning and remobilization during the reproductive development of rice (*Oryza sativa* L.). *Rice* 5, 27.
92. **Stephan UW, Schmidke I, Pich A.** 1994. Phloem translocation of Fe, Cu, Mn, and Zn in *Ricinus* seedlings in relation to the concentrations of nicotianamine, an endogenous chelator of divalent metal ions, in different seedling parts. *Plant and Soil* 165, 181-188.
93. **Suzuki K, Itai R, Suzuki K, et al.** 1998. Formate dehydrogenase, an enzyme of anaerobic metabolism, is induced by iron deficiency in barley roots. *Plant Physiology* 116, 725-732.
94. **Tauris B, Borg S, Gregersen PL, et al.** 2009. A roadmap for zinc trafficking in the developing barley grain based on laser capture microdissection and gene expression profiling. *Journal of Experimental Botany* 60, 1333-1347.
95. **Wairich A, de oliveira BHN, Arend EB, et al.** 2019. The combined strategy for iron uptake is not exclusive to domesticated rice (*Oryza sativa*). *Scientific Reports* 9, 16144.
96. **Wang M, Xu Q, Yu J, et al.** 2010. The putative *Arabidopsis* zinc transporter ZTP29 is involved in the response to salt stress. *Plant Molecular Biology* 73, 467-479.
97. **Wang Y, Wang X, Wang C, et al.** 2017. Transcriptomic profiles reveal the interactions of Cd/Zn in dwarf polish wheat (*Triticum polonicum* L.) roots. *Frontiers in Physiology* 8, 168.
98. **Wang S, Li L, Ying Y, et al.** 2019. A transcription factor OsbHLH156 regulates Strategy II iron acquisition through localizing IRO2 to the nucleus in rice. *New Phytology* 225, 1247-1260.
99. **Wishart K.** 2017. Increased micronutrient requirements during physiologically demanding situations: review of the current evidence. *Vitamins & Minerals* 6, 1-16.
100. **Xiao JX, Qi XX, Zhang SL.** 2010. Effects of zinc- and iron deficiency on physiological indices, mineral contents, and leaf ultrastructure of *Poncirus trifoliata*. *Journal of Applied Ecology*, 21, 1974-1980.
101. **Xie C, Mao X, Huang J, et al.** 2011. KOBAS 2.0: a web server for annotation and identification of enriched pathways and diseases. *Nucleic Acids Research* 39, W316-W322.
102. **Yamaguchi H, Nakanishi H, Nishizawa NK, et al.** 2000. Induction of the ID11 gene in Fe-deficient barley roots: a gene encoding a putative enzyme that catalyses the Met salvage pathway for phytosiderophore production. *Soil Science and Plant Nutrition* 46, 1-9.

103. **Yan JY, Li CX, Sun L, et al.** 2016. A WRKY transcription factor regulates Fe translocation under Fe deficiency. *Plant Physiology* 171, 2017-2027.
104. **Zamioudis C, Hanson J, Pieterse CMJ.** 2014.  $\beta$ -Glucosidase BGLU42 is a MYB72-dependent key regulator of rhizobacteria-induced systemic resistance and modulates iron deficiency responses in *Arabidopsis* roots. *Journal of Physiology* 204, 368-379.
105. **Zeng H, Zhang X, Ding M, et al.** 2019. Integrated analyses of miRNAome and transcriptome reveal zinc deficiency responses in rice seedlings. *BMC Plant Biology* 19, 585.
106. **Zhang Y, Xu YH, Yi HY, et al.** 2012: Vacuolar membrane transporters OsVIT1 and OsVIT2 modulate iron translocation between flag leaves and seeds in rice. *Plant Journal* 72, 400-410.
107. **Zhang BJ, Zhang XX, Luo LG.** 2013. The major gene families related to cadmium absorption and transportation in plants. *Genomics and Applied Biology* 32, 127-134.
108. **Gupta A, Singh C, Kumar V, et al.** 2018. Wheat Varieties Notified in India since 1965. ICAR-Indian Institute of Wheat & Barley Research, Karnal- 132001, India, 101pp.
109. **Ranieri A, Castagna A, Baldan B, et al.** 2001. Iron deficiency differently affects peroxidase isoforms in sunflower. *Journal of Experimental Botany* 52(354), 25-35.
110. **Molassiotis A, Tanou G, Diamantidis G, et al.** 2006. Effects of 4-month Fe deficiency exposure on Fe reduction mechanism, photosynthetic gas exchange, chlorophyll fluorescence and antioxidant defence in two peach rootstocks differing in Fe deficiency tolerance. *Journal of Plant Physiology* 163(2), 176-185.
111. **Donnini S, Dellorto M, Zocchi G.** 2011. Oxidative stress responses and root lignification induced by Fe deficiency conditions in pear and quince genotypes. *Tree Physiology* 31(1), 102-113.

## Tables

**Table 1:** Pedigree details and Fe and Zn content of the genotypes used in the present study.

| <b>Genotypes</b> | <b>Pedigree</b>                    | <b>Notification number and date</b> | <b>Average Grain Fe &amp; Zn (ppm)</b> | <b>Special features</b>                               | <b>References</b>  |
|------------------|------------------------------------|-------------------------------------|----------------------------------------|-------------------------------------------------------|--------------------|
| Narmada 195      | C306/HY65<br>(selection of N-112 ) | 19(E)<br>14.01.1982                 | Fe:42;<br>Zn:38                        | Tolerance to lodging                                  | Gupta et al., 2018 |
| PBW 502          | W 485 /PBW 343//<br>RAJ 1482       | 161(E)<br>04.02.2004                | Fe:34;<br>Zn:30                        | Resistance to yellow rust, brown rust and karnal bunt |                    |

**Table 2:** Morpho-physiological features and Fe & Zn content (ppm on a dry weight basis) in Narmada 195 and PBW 502 grown under all three treatment conditions, *i.e.* C, T1 and T2.

| Treatments         | Root Length (cm)                 | Shoot length (cm)               | Chlorophyll conc. (SPAD value)  | Leaf Area (cm <sup>2</sup> )   | Zn (ppm)                          |                                  | Fe (ppm)                          |                                  |
|--------------------|----------------------------------|---------------------------------|---------------------------------|--------------------------------|-----------------------------------|----------------------------------|-----------------------------------|----------------------------------|
|                    |                                  |                                 |                                 |                                | Root                              | Shoot                            | Root                              | Shoot                            |
| <b>Narmada 195</b> |                                  |                                 |                                 |                                |                                   |                                  |                                   |                                  |
| <b>Control (C)</b> | 13.2±1.24 <sup>ab</sup>          | 25.9±0.21 <sup>c</sup>          | 40.2±2.41 <sup>f</sup>          | 9.3±0.58 <sup>c</sup>          | 29.3±5.24 <sup>c</sup>            | 19.4±4.83 <sup>c</sup>           | 228.3±13.26 <sup>e</sup>          | 192.4±28.70 <sup>e</sup>         |
| <b>T1</b>          | 14.5±0.91 <sup>abc</sup><br>(9%) | 16±0.20 <sup>c</sup><br>(38%)   | 26.4±0.89 <sup>e</sup><br>(34%) | 6.2±0.38 <sup>b</sup><br>(33%) | 23.5±6.86 <sup>abc</sup><br>(20%) | 13.5±2.54 <sup>bc</sup><br>(30%) | 186.2±14.10 <sup>d</sup><br>(18%) | 123.5±6.15 <sup>d</sup><br>(36%) |
| <b>T2</b>          | 14.7±0.36 <sup>bc</sup><br>(11%) | 15.7±0.33 <sup>c</sup><br>(40%) | 15.3±0.53 <sup>b</sup><br>(62%) | 6±0.21 <sup>b</sup><br>(35%)   | 22±5.23 <sup>abc</sup><br>(25%)   | 12.3±2.63 <sup>ab</sup><br>(37%) | 79.2±10.03 <sup>c</sup><br>(65%)  | 58.8±5.76 <sup>b</sup><br>(69%)  |
| <b>PBW 502</b>     |                                  |                                 |                                 |                                |                                   |                                  |                                   |                                  |
| <b>Control (C)</b> | 15.8±0.44 <sup>c</sup>           | 17.7±1.12 <sup>d</sup>          | 28.8±0.83 <sup>d</sup>          | 6±0.07 <sup>b</sup>            | 25.6±3.72 <sup>bc</sup>           | 15.4±2.11 <sup>bc</sup>          | 199±18.12 <sup>d</sup>            | 168.6±10.57 <sup>e</sup>         |
| <b>T1</b>          | 16±0.93 <sup>c</sup><br>(1%)     | 10±0.22 <sup>b</sup><br>(44%)   | 18±1.49 <sup>c</sup><br>(38%)   | 3.1±0.12 <sup>a</sup><br>(51%) | 18.2±4.50 <sup>ab</sup><br>(29%)  | 10±3.86 <sup>ab</sup><br>(34%)   | 132.2±17.57 <sup>b</sup><br>(34%) | 92.6±7.16 <sup>c</sup><br>(46%)  |
| <b>T2</b>          | 12.8±1.31 <sup>a</sup><br>(19%)  | 8.7±0.45 <sup>a</sup><br>(51%)  | 5.5±0.73 <sup>a</sup><br>(81%)  | 2.9±0.23 <sup>a</sup><br>(49%) | 14.5±4.68 <sup>a</sup><br>(43%)   | 6.1±3.21 <sup>a</sup><br>(60%)   | 50±11.56 <sup>a</sup><br>(76%)    | 31.1±5.12 <sup>a</sup><br>(82%)  |

Note: Different letters indicate significant differences between means ± SD of treatments (n = 3) at P<0.05. Figures in brackets depict percentage change from respective control in each genotype.

**Table 3:** Changes in SOD, CAT, GR, H<sub>2</sub>O<sub>2</sub>, MDA and PS content and antioxidant capacity in Narmada 195 and PBW 502 in response to all the three treatment conditions, *i.e.* C, T1 and T2.

| Treatments         | SOD (units/g FW)                  | CAT (μmoles/min/g FW)            | GR (mM TNB min/g FW)            | H <sub>2</sub> O <sub>2</sub> (μmol/g FW) | MDA (μM/ g FW)                   | DPPH Radical Scavenging activity (%) | PS (nmol of Fe equivalent /g root biomass) |
|--------------------|-----------------------------------|----------------------------------|---------------------------------|-------------------------------------------|----------------------------------|--------------------------------------|--------------------------------------------|
| <b>Narmada 195</b> |                                   |                                  |                                 |                                           |                                  |                                      |                                            |
| <b>Control</b>     | 23.1±1.92 <sup>d</sup>            | 8.6±0.91 <sup>a</sup>            | 1.8±0.28 <sup>ab</sup>          | 2.4±0.27 <sup>a</sup>                     | 4.7±0.77 <sup>a</sup>            | 30.7±1.82 <sup>a</sup>               | 2.7±0.19 <sup>a</sup>                      |
| <b>T1</b>          | 19.4±0.97 <sup>c</sup><br>(-1.19) | 14.2±1.17 <sup>b</sup><br>(1.65) | 4.4±0.88 <sup>c</sup><br>(2.4)  | 4.7±0.39 <sup>b</sup><br>(1.95)           | 5.9±0.24 <sup>b</sup><br>(1.25)  | 51.1±1.42 <sup>d</sup><br>(1.66)     | 3.6±0.82 <sup>b</sup><br>(1.32)            |
| <b>T2</b>          | 7.7±2.32 <sup>b</sup><br>(-3)     | 18.6±0.91 <sup>c</sup><br>(2.61) | 4.8±1.06 <sup>c</sup><br>(2.6)  | 6.4±0.49 <sup>c</sup><br>(2.66)           | 5.3±0.47 <sup>ab</sup><br>(1.12) | 53.6±1.53 <sup>d</sup><br>(1.74)     | 6±0.22 <sup>c</sup><br>(2.21)              |
| <b>PBW 502</b>     |                                   |                                  |                                 |                                           |                                  |                                      |                                            |
| <b>Control</b>     | 21.3±0.94 <sup>cd</sup>           | 10.1±1.68 <sup>a</sup>           | 1.2±0.036 <sup>a</sup>          | 2.3±0.49 <sup>a</sup>                     | 5±0.25 <sup>ab</sup>             | 37.4±1.41 <sup>b</sup>               | 2.1±0.21 <sup>a</sup>                      |
| <b>T1</b>          | 9.8±1.05 <sup>b</sup><br>(-2.17)  | 10.5±2.14 <sup>a</sup><br>(1.03) | 2.4±0.35 <sup>ab</sup><br>(2.0) | 3.9±0.29 <sup>b</sup><br>(1.69)           | 7.4±0.56 <sup>c</sup><br>(1.48)  | 40.3±1.59 <sup>b</sup><br>(1.08)     | 2.7±0.18 <sup>a</sup><br>(1.32)            |
| <b>T2</b>          | 2.8±0.36 <sup>a</sup><br>(-7.6)   | 10.9±0.34 <sup>a</sup><br>(1.07) | 2.7±0.59 <sup>b</sup><br>(2.25) | 4.1±0.67 <sup>b</sup><br>(1.78)           | 8.1±0.89 <sup>c</sup><br>(1.62)  | 44.4±4.34 <sup>c</sup><br>(1.19)     | 3.6±0.30 <sup>b</sup><br>(1.72)            |

Note: Different letters indicate significant differences between means ± SD of treatments (n = 3) at P<0.05. The figure in brackets depicts fold change from respective control in each genotype.



**Table 4:** List of critical genes associated with Met cycle, PS biosynthesis, antioxidant pathway and Fe & Zn transport system and their chromosomal locations

| Sr. No                               | Transcript ID                      | IWGSC Gene Id      | Chr location | Gene Name                                                 |
|--------------------------------------|------------------------------------|--------------------|--------------|-----------------------------------------------------------|
| <b>Methionine cycle</b>              |                                    |                    |              |                                                           |
| 1.                                   | NODE_139907_length_361_cov_3.34314 | TraesCS4B02G014700 | 4B           | Methionine synthase                                       |
| 2.                                   | NODE_10030_length_2203_cov_31.2784 | TraesCS2D02G493500 | 2D           | S-adenosylhomocysteine hydrolase                          |
| 3.                                   | NODE_34963_length_1154_cov_15.2402 | TraesCS4A02G065100 | 4A           | Homocystein S-methyltransferase                           |
| 4.                                   | NODE_16088_length_1799_cov_24.8939 | TraesCS3B02G228500 | 3B           | S-adenosylmethioninesynthetase                            |
| 5.                                   | NODE_3245_length_3201_cov_10.5372  | TraesCS6D02G202500 | 6D           | S-adenosylmethioninedecarboxylas                          |
| 6.                                   | NODE_88157_length_530_cov_3.56     | TraesCS2A02G396400 | 2A           | 1-aminocyclopropane-1-carboxylic acid synthase (ACS2)     |
| 7.                                   | NODE_123078_length_398_cov_84.0525 | TraesCS7D02G029100 | 7D           | 5'-methylthioadenosine nucleosidase                       |
| 8.                                   | NODE_93542_length_503_cov_57.471   | TraesCS2D02G545000 | 2D           | 5-methylthioribose kinase                                 |
| 9.                                   | NODE_17367_length_1739_cov_60.076  | TraesCS4D02G104900 | 4D           | Methylthioribose-1-phosphate isomerase                    |
| 10.                                  | NODE_119513_length_407_cov_38.3949 | TraesCS4B02G157700 | 4B           | Cystathionine gamma-synthase                              |
| <b>Phytosiderophore biosynthesis</b> |                                    |                    |              |                                                           |
| 11.                                  | NODE_63800_length_708_cov_24.6263  | TraesCS3B02G068500 | 3B           | Nicotianamine synthase (NAS)                              |
| 12.                                  | NODE_13301_length_1959_cov_96.1266 | TraesCS1B02G300600 | 1B           | Nicotianamine aminotransferase(NAAT)                      |
| 13.                                  | NODE_37066_length_1105_cov_18.341  | TraesCS2D02G313700 | 2D           | DMAS or 3"-deamino-3"-oxonicotianamine reductase          |
| 14.                                  | NODE_23989_length_1468_cov_38.2831 | TraesCS7A02G159200 | 7A           | 2'-deoxymugineic-acid 2'-dioxygenase or DMAD              |
| <b>Fe and Zn transport system</b>    |                                    |                    |              |                                                           |
| 15.                                  | NODE_31063_length_1254_cov_6.90575 | TraesCS6D02G406400 | 6D           | Solute carrier family 30 (zinc transporter)               |
| 16.                                  | NODE_30981_length_1256_cov_40.597  | TraesCS4A02G025400 | 4A           | Solute carrier family 39 (zinc transporter)               |
| 17.                                  | NODE_23970_length_1469_cov_50.3607 | TraesCS7B02G251700 | 7B           | ZIP metal ion transporter(ZTP29) gene                     |
| 18.                                  | NODE_14782_length_1872_cov_6.75564 | TraesCS4D02G299400 | 4D           | Natural resistance-associated macrophage protein 2        |
| 19.                                  | NODE_32210_length_1224_cov_7.50043 | TraesCS4B02G190300 | 4B           | Solute carrier family 25 (mitochondrial iron transporter) |
| 20.                                  | NODE_35382_length_1144_cov_6.6685  | TraesCS7D02G413000 | 7D           | Vacuolar iron transporter family protein                  |
| 21.                                  | NODE_117812_length_412_cov_7.27171 | TraesCS1D02G295000 | 3B           | Iron transport multicopper oxidase                        |
| 22.                                  | NODE_137313_length_366_cov_1.34084 | TraesCS3D02G257900 | 3D           | Multidrug resistance protein 1 homolog                    |
| <b>Antioxidant system</b>            |                                    |                    |              |                                                           |
| 23.                                  | NODE_15181_length_1849_cov_11.136  | TraesCS6B02G056800 | 6B           | Catalase (CAT)                                            |
| 24.                                  | NODE_22558_length_1521_cov_15.6965 | TraesCS7A02G090400 | 7A           | Super oxide dismutase (SOD)                               |
| 25.                                  | NODE_19134_length_1658_cov_101.022 | TraesCS6A02G383800 | 6A           | Glutathione reductase (GR)                                |

896 **Figure legends**

897 **Fig. 1:** A schematic outline of the experimental setup, along with the analysed parameters.

898 **Fig. 2:** Figures representing the progression of morphological symptoms depicting chlorosis of leaves in (A) Narmada 195 and (B)  
899 PBW 502; and reduction in the number of lateral roots in (C) Narmada 195 and (D) PBW 502.

900 **Fig. 3:** Analysis of DEG data from the wheat root and shoot during Fe & Zn withdrawal in Narmada 195 and PBW 502. (A)  
901 Comparison of the number of up ( $\log_{2}FC > 1$ ), down ( $\log_{2}FC < -1$ ) and neutrally regulated ( $\log_{2}FC = -1$  to  $1$ ) DEGs under T1 and T2  
902 conditions. (B) Venn diagram showing the numbers of unique and overlapping expressed genes in control, (C) T1, and (D) T2 across  
903 tissues and genotypes. (E) Volcano plot of DEGs in Narmada 195 T1 root & shoot; (F) Narmada 195 T2 root & shoot; (G) PBW 502  
904 T1 root & shoot; (H) PBW 502 T2 root & shoot. Genes having the most significant differences are circled with red colour. (I)  
905 Pearson's correlation matrix between samples using the cor R package.

906 **Fig. 4:** Gene Ontology (GO) categorization and enrichment analysis of DEGs. (A) Doughnut chart describing the frequency of top ten  
907 enriched GO terms under biological, cellular and molecular function. (B) Distribution of top 15 highly enriched KEGG pathways  
908 under T1 & T2 conditions. The *x*-axis shows the number of genes belonging to each KEGG pathway; the *y*-axis shows the pathways'  
909 name. (C) A pie chart depicting the top ten species distribution for the annotated DEGs.

910 **Fig. 5:** Genomic distribution of core genes. (A) Chromosomal distribution of the core DEGs. (B) Pie charts showing the subgenomic  
911 distribution of the core genes. A, B, and D refers to the sub-genome of hexaploid wheat. (C) STRING analysis of the co-expressed  
912 core DEGs showing protein-protein interaction (PPI) network.

913 **Fig. 6:** RT-qPCR validation of the core genes associated with (A) Met cycle and (B) PS biosynthesis. ARF1 and actin were used as an  
914 endogenous control for normalizing the Ct value. Data are means of three independent biological replicates ( $P \leq 0.05$ ,  $n = 3$ ). Error  
915 bars represent the means  $\pm$  SD ( $n = 3$ ). Abbreviations: MS: Met synthase; SAHH: S-adenosylhomocysteine hydrolase; HMT:  
916 homocystein S-methyltransferase; SAMS: S-adenosylMetsynthetase; SAMD: S-adenosylMet decarboxylase; ACCS: 1-  
917 aminocyclopropane-1-carboxylic acid synthase (ACS2); MTAN: 5'-methylthioadenosine nucleosidase; MTRK: 5-methylthioribose

918 kinase; MPI: methylthioribose-1-phosphate isomerase; CGS: cystathionine gamma-synthase; NAS: Nicotianamine synthase;  
919 NAAT:niconianamine amino transferase; DMAS: 3"-deamino-3"-oxonicotianamine reductase; DMAD: 2'-deoxymugineic-acid 2'-  
920 dioxygenase.

921 **Fig. 7:** RT-qPCR validation of the core genes associated with (A) Fe & Zn transport system and (B) antioxidant pathway. ARF1 and  
922 actin were used as an endogenous control for normalizing the Ct value. Data are means of three independent biological replicates ( $P \leq$   
923 0.05,  $n = 3$ ). Error bars represent the means  $\pm$  SD ( $n = 3$ ). Abbreviations: SC30:solute carrier family 30 (zinc transporter); SC39:  
924 solute carrier family 39 (zinc transporter); ZTP29: ZIP metal ion transporter; NRAMP: natural resistance-associated macrophage  
925 protein 2; SC25: solute carrier family 25 (mitochondrial iron transporter); VIT: vacuolar iron transporter; MCO: iron transport  
926 multicopper oxidase; MDRP1: multidrug resistance protein 1 homolog; SOD: superoxide dismutase; GR: glutathione reductase.

927 **Fig. 8:** List of TFs significantly associated with Fe & Zn withdrawal ( $FDR \leq 0.05$ ) in root and shoot of the contrasting wheat  
928 genotypes. Blue bars represent up-regulated, the red bar is down-regulated, and the green bar represents neutrally regulated.

929 **Fig. 9:** Schematic model representing the involvement of core genes in the Met cycle, PS biosynthesis, antioxidant and transport  
930 system in response to Fe & Zn withdrawal in wheat. The expression of transcripts is depicted in the colour scale. Colour scale refers to  
931 the log2 fold change values of differentially expressed transcripts: red colour refers to those transcripts positively regulated, while  
932 green colour denotes negatively regulated transcripts upon Fe & Zn withdrawal. NR: Narmada 195; PBW: PBW 502.

933

934

Wheat, (*T. aestivum*)  
30 days old seedlings

Narmada 195  
(Fe & Zn efficient)

PBW 502  
(Fe & Zn inefficient)

Root

Shoot

Root

Shoot

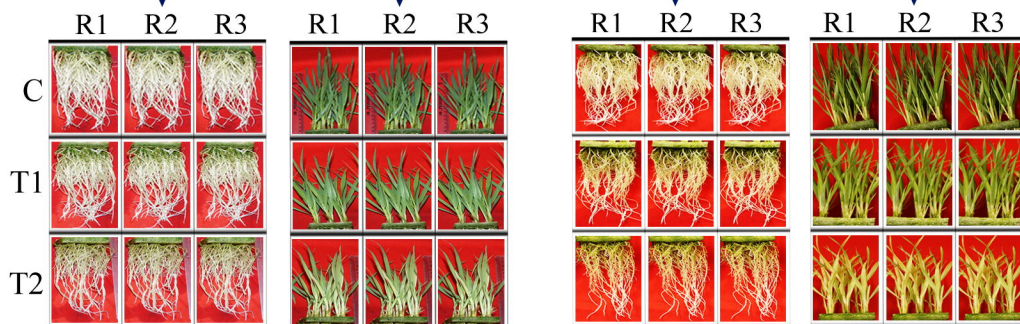

**Treatment conditions**

| Treatment | Hoagland solution                                                                  |                      |                           |
|-----------|------------------------------------------------------------------------------------|----------------------|---------------------------|
|           | Fe ( $\mu\text{M}$ )                                                               | Zn ( $\mu\text{M}$ ) | Details                   |
| Control   | 100                                                                                | 0.77                 | Full strength for 30 days |
| T1        | 50                                                                                 | 0.38                 | Half strength for 30 days |
| T2        | Full strength for 18 days followed by 0 ( $\mu\text{M}$ ) Fe & Zn for next 12 days |                      |                           |

### Physiological traits

- Root and shoot length
- Chlorophyll content
- Leaf area

### Biochemical traits

- SOD, GR, Catalase assay
- $\text{H}_2\text{O}_2$  and MDA content
- Total antioxidant capacity
- Phytosiderophore content
- Elemental Fe & Zn analysis

### Transcriptome analysis

- Library preparation and sequencing
- Mapping, KEGG pathway, GO & enrichment analysis, Differential expression analysis, qPCR, TF and Pfam analysis etc.

**Biological insights**

Explains the basis of high & low Fe & Zn in Narmada 195 & PBW 502, respectively

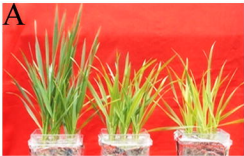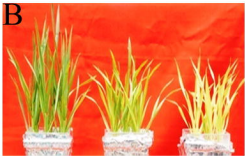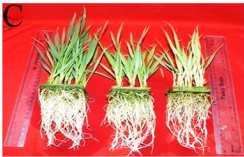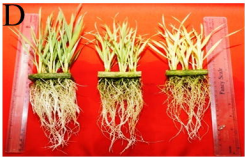







A.

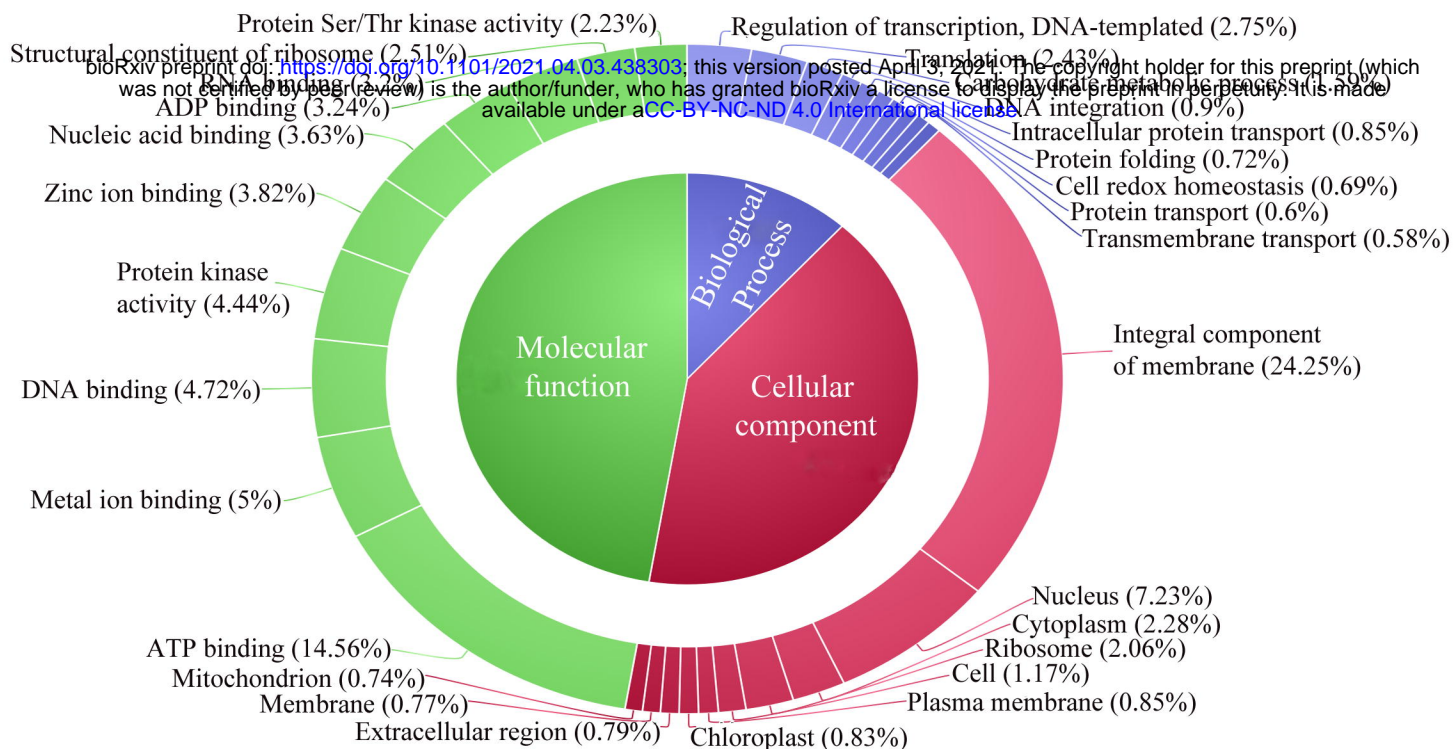

B.

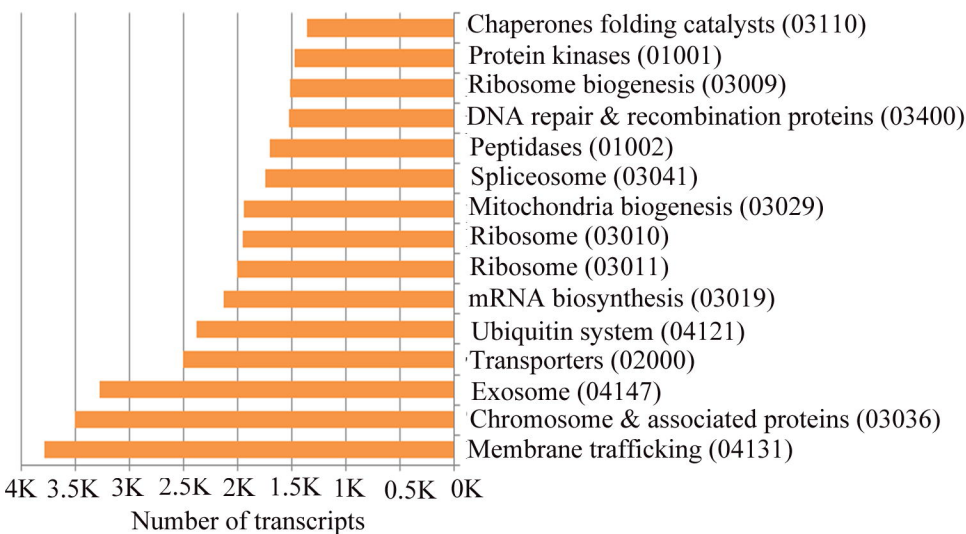

C.

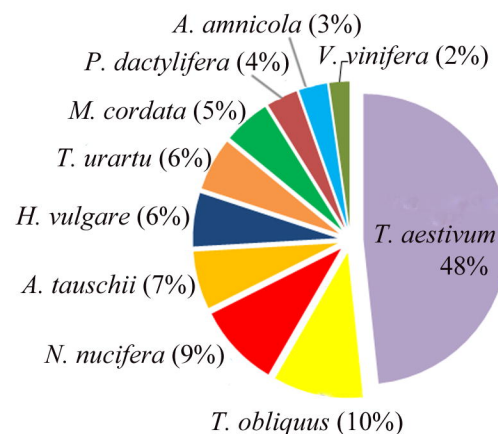

A. Gene Ontology (GO) enrichment analyses of DEGs, B. Distribution of top ten most abundant KEGG pathways of DEGs among four wheat genotypes. The X-axis indicates the number of transcripts belonging to the KEGG pathway on the left side, C. Species distribution of annotated transcripts.

A.

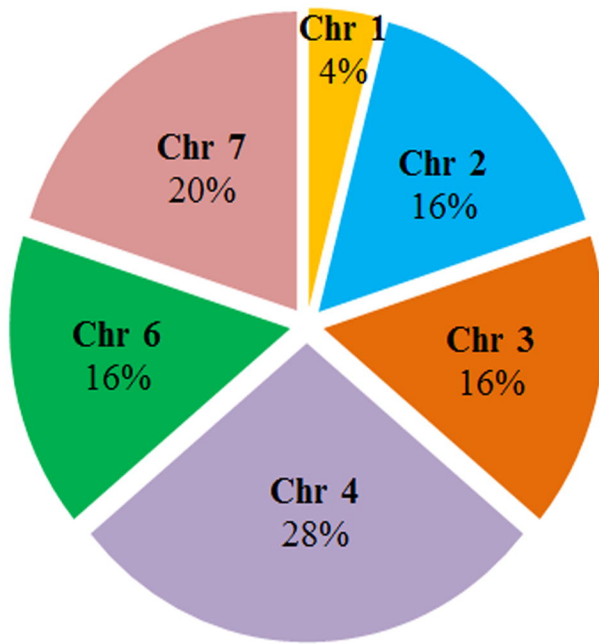

B.

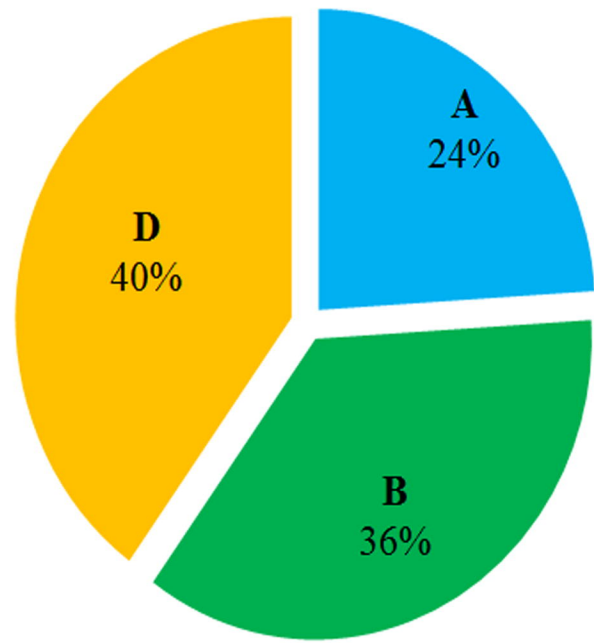

C.

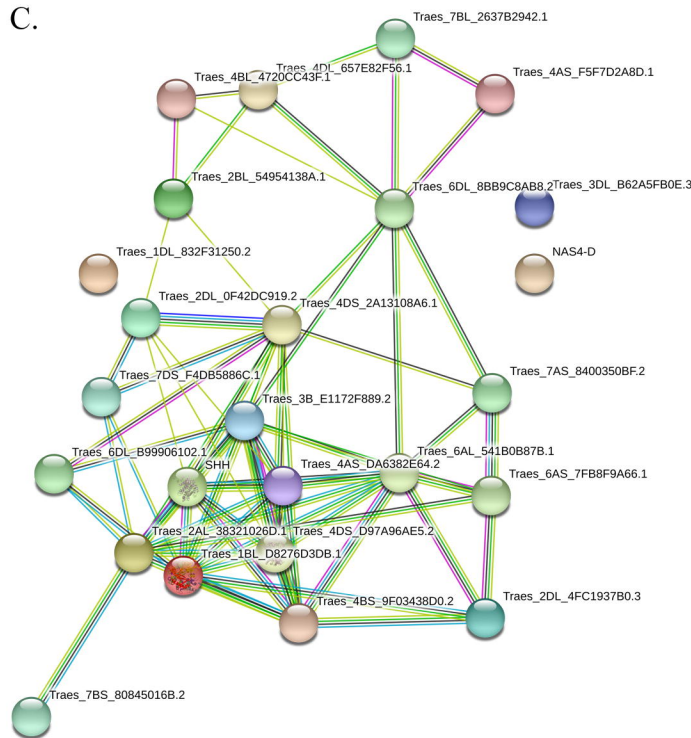

Genomic distribution of selected genes exposed to Fe and Zn deficiency under Hydroponic condition. (A) Chromosomal distribution of selected DEGs; (B) Pie charts showing subgenomic distribution of selected DEG. A, B, and D refers to the subgenome of hexaploid wheat; (C) STRING analysis showing interaction network among the core genes.

A

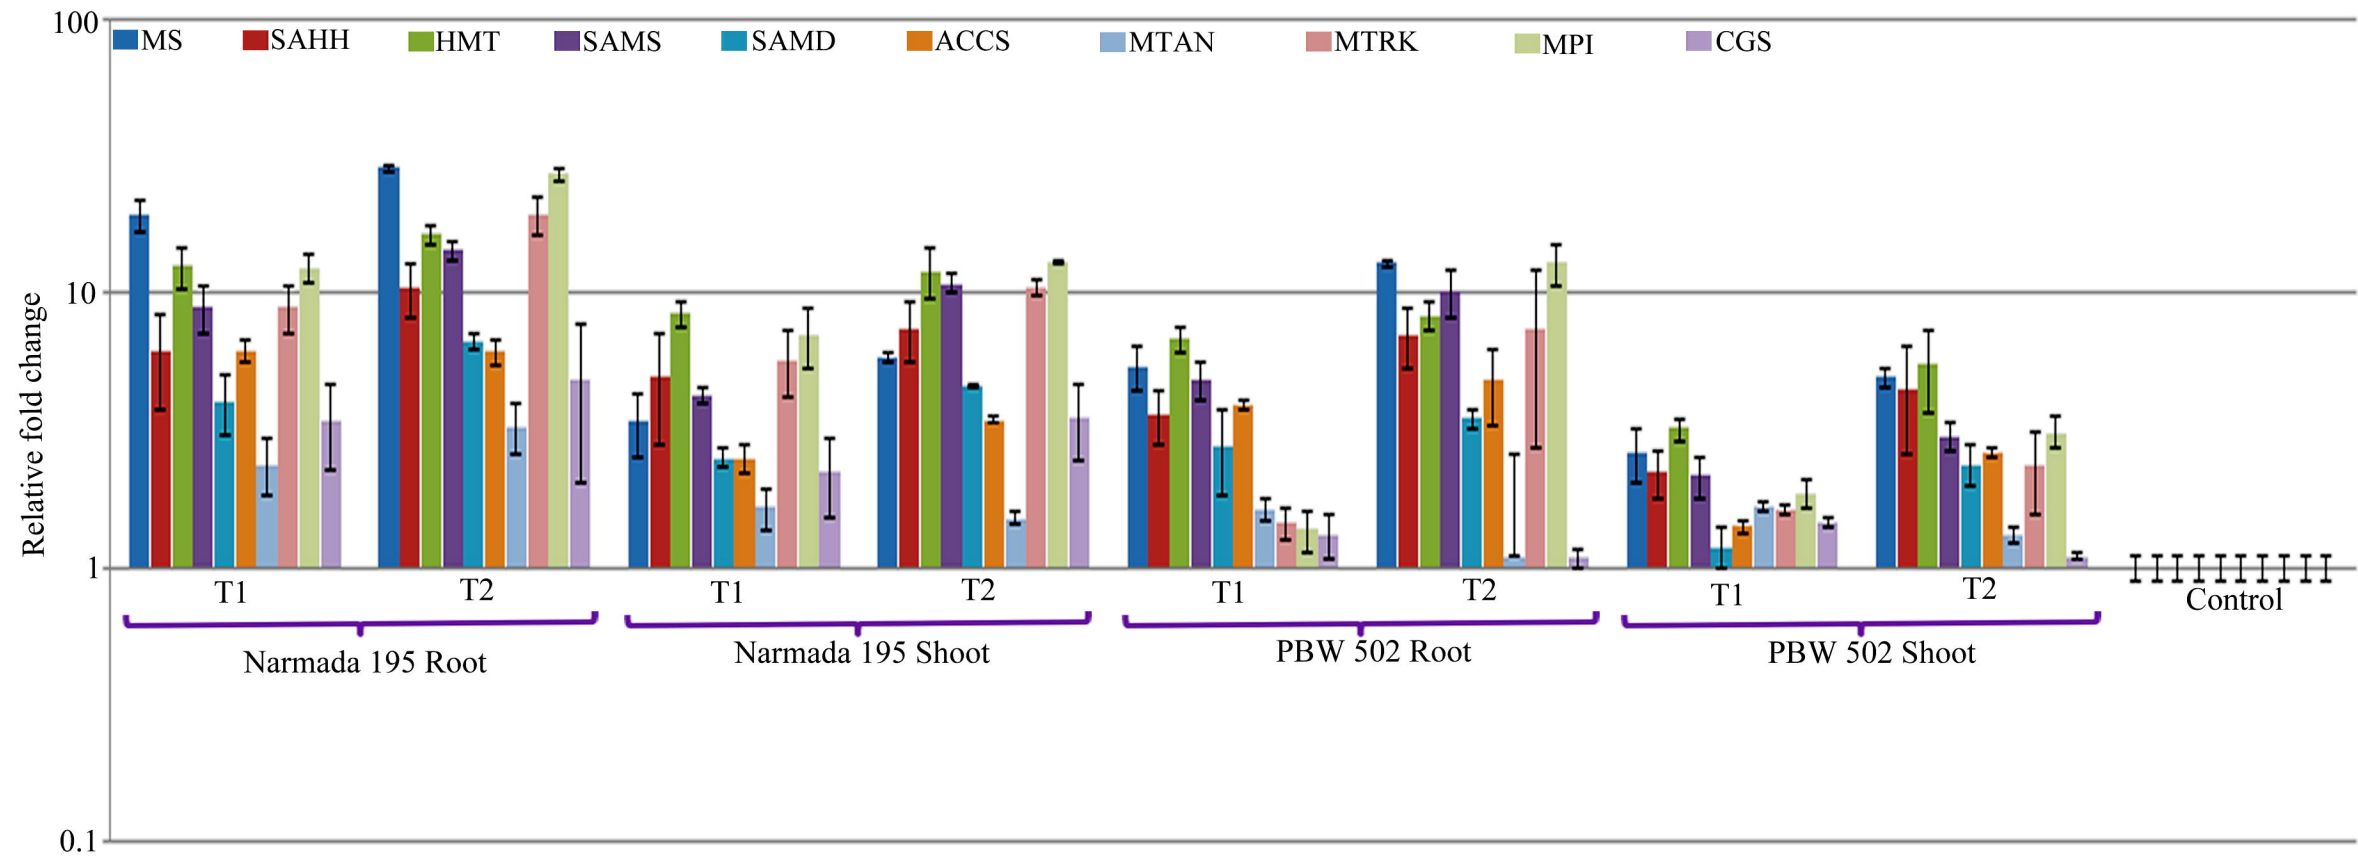

B

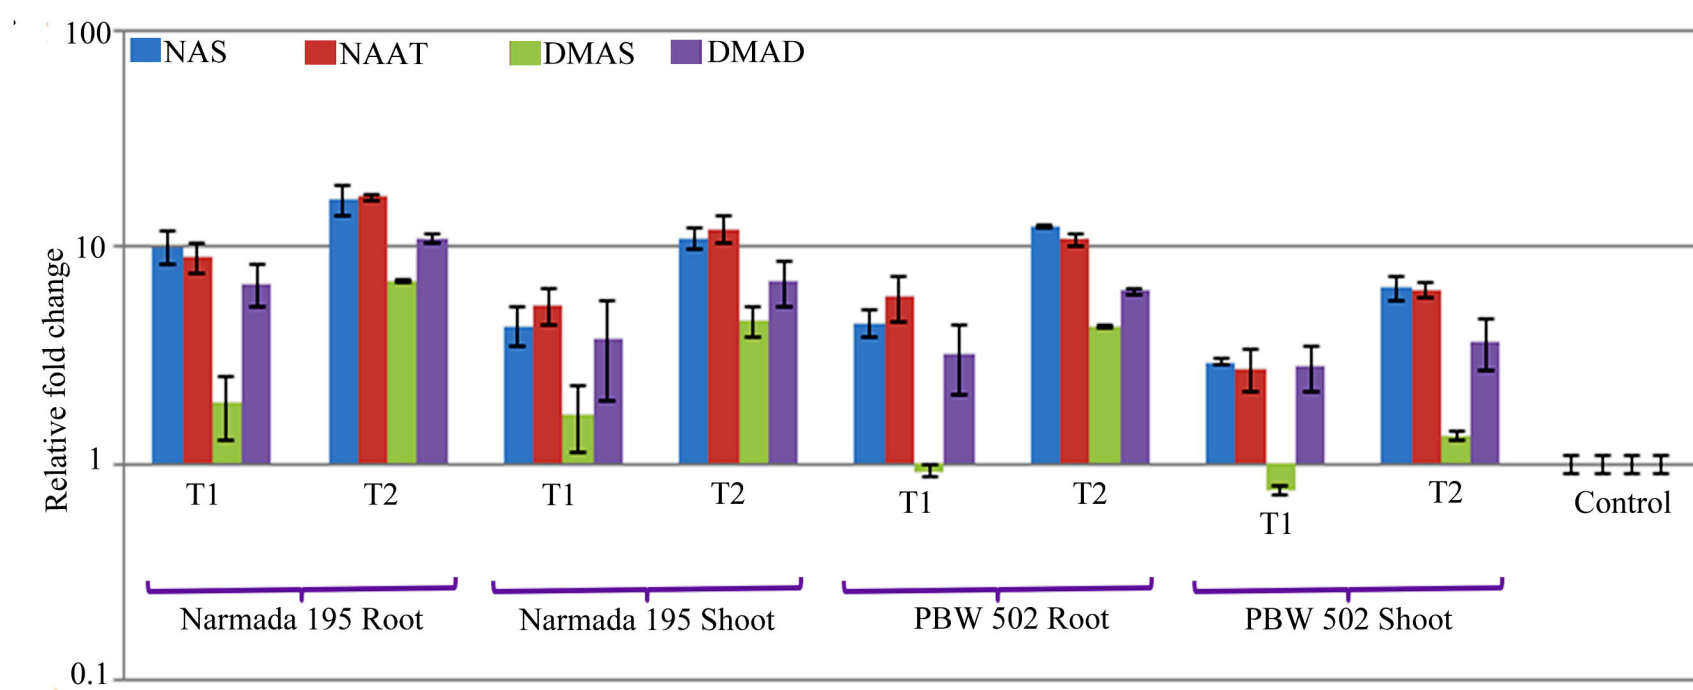

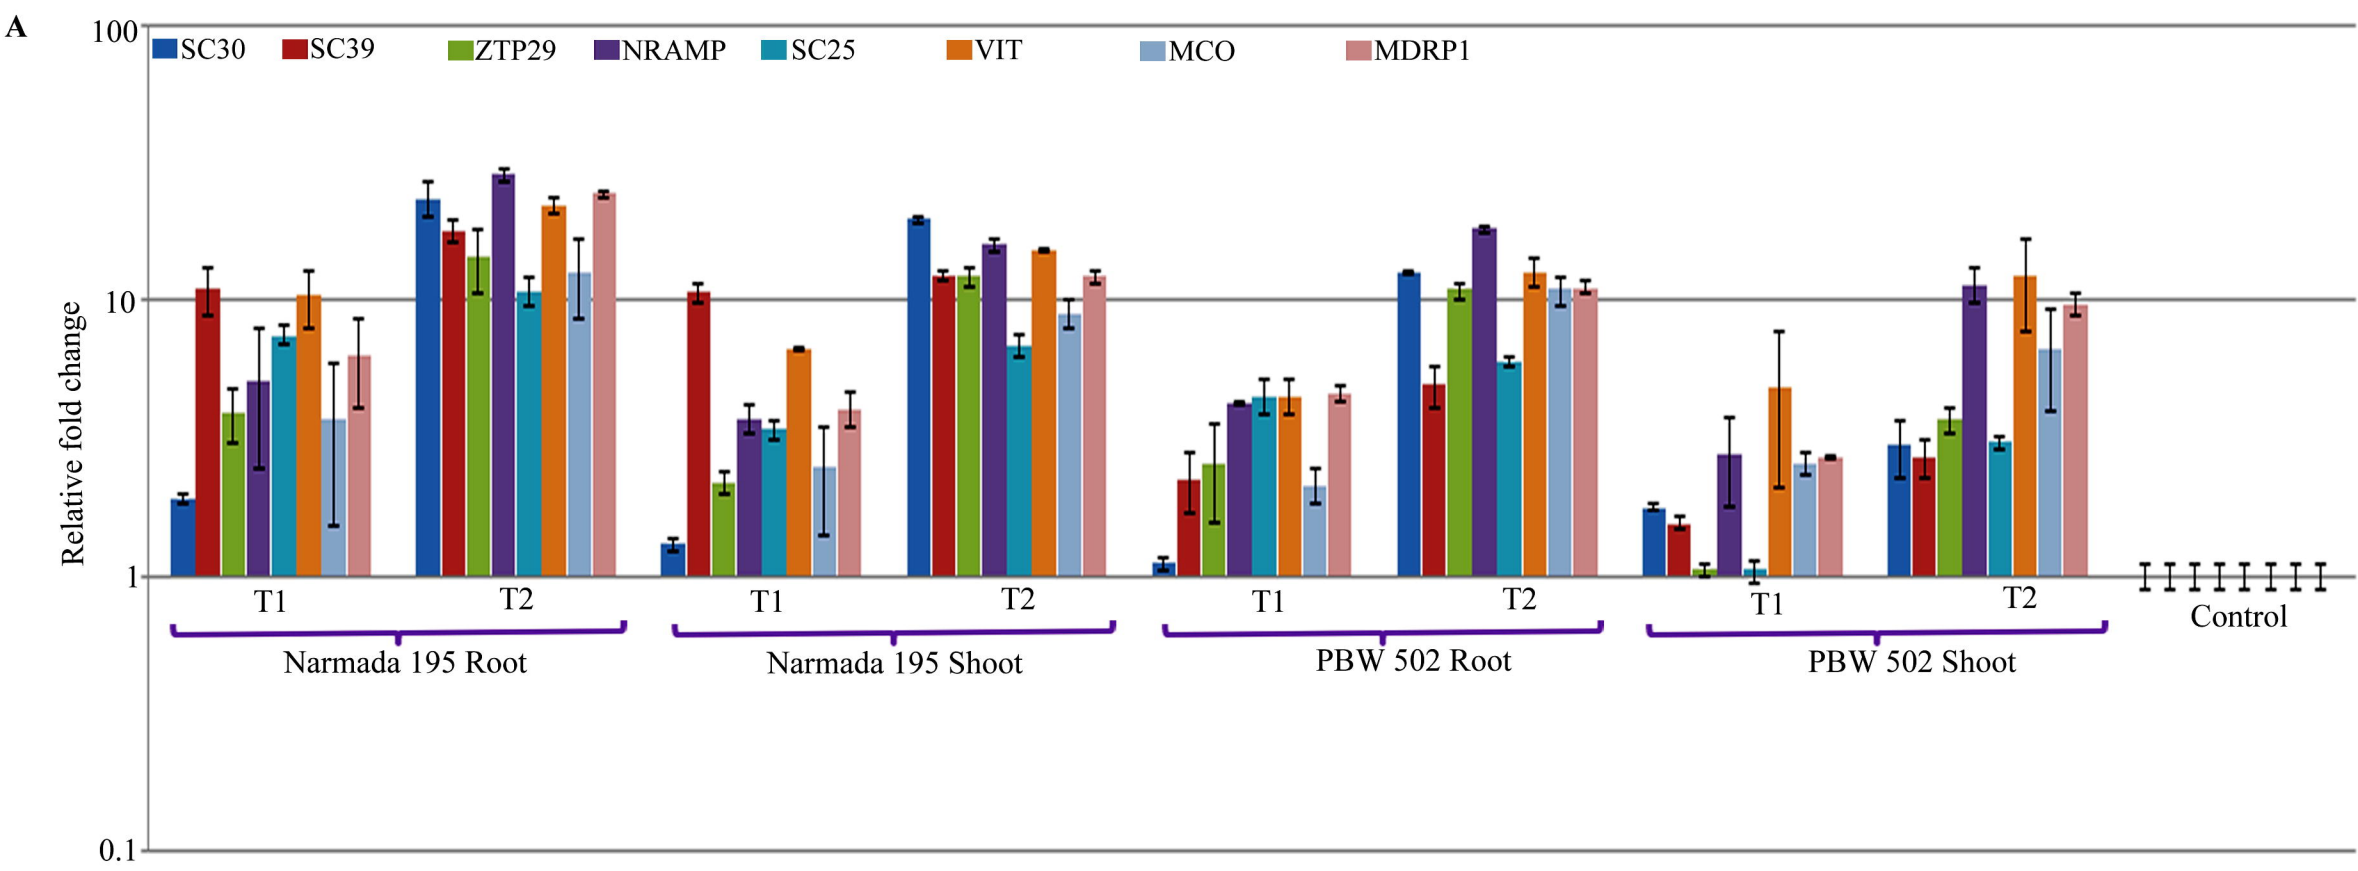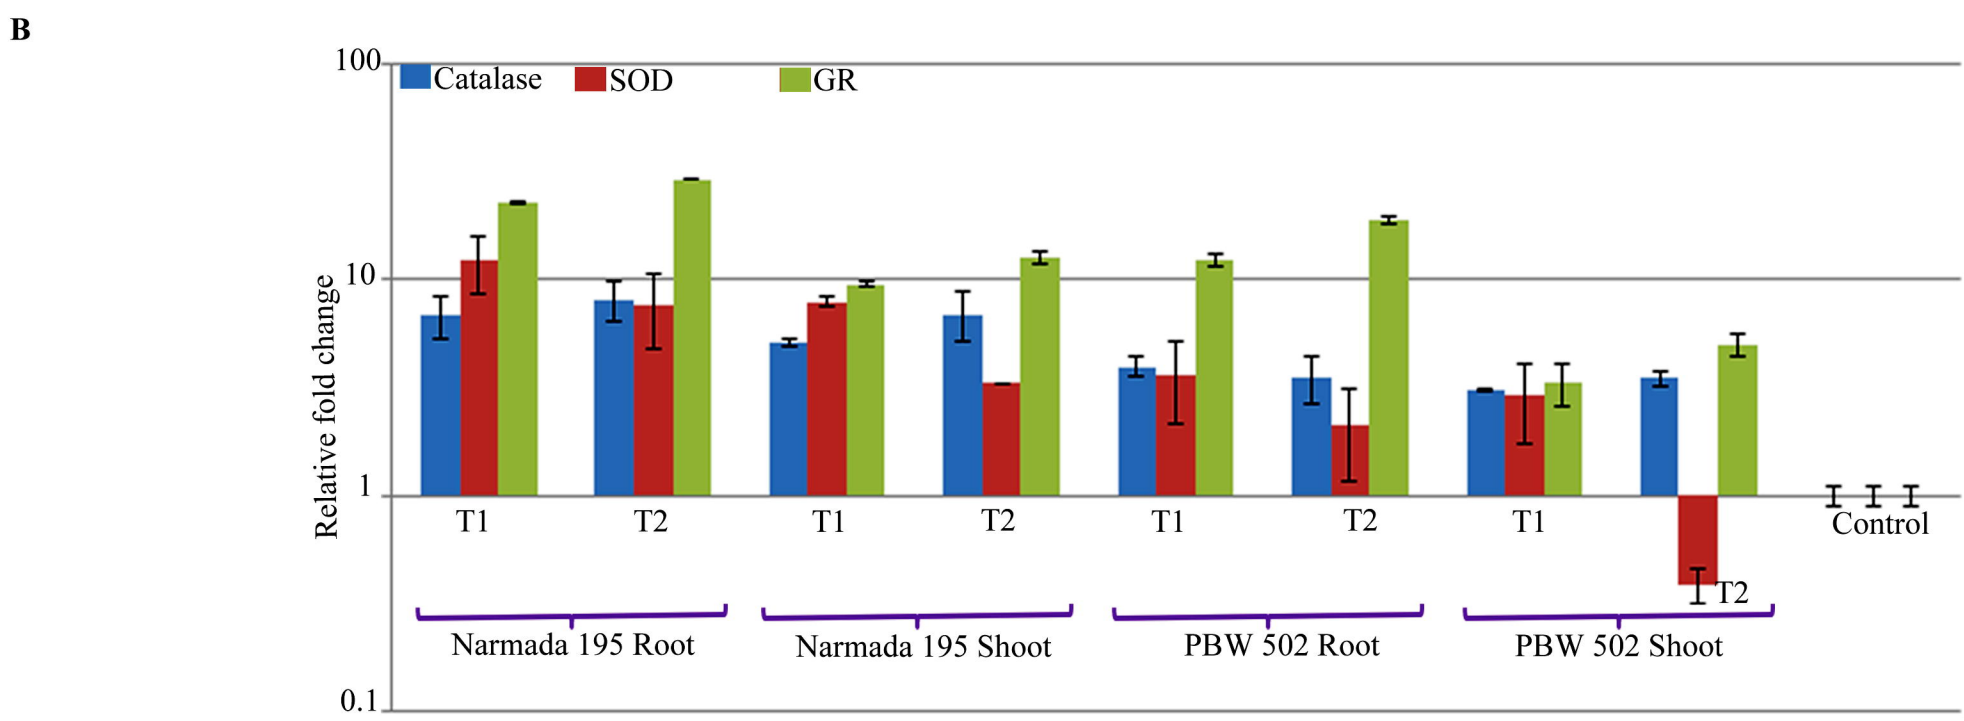

Number of DEGs

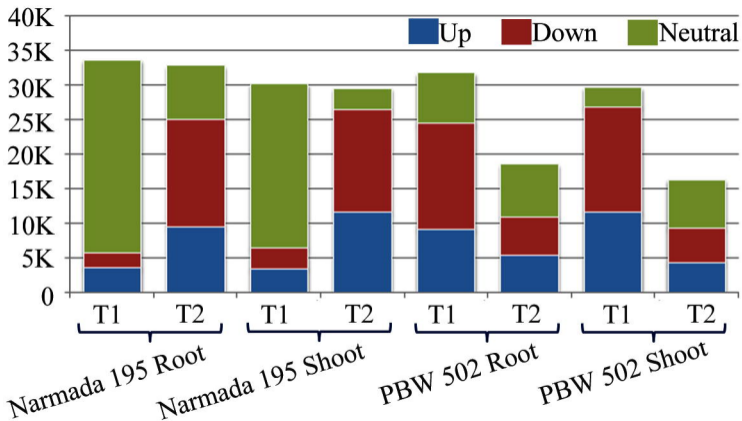



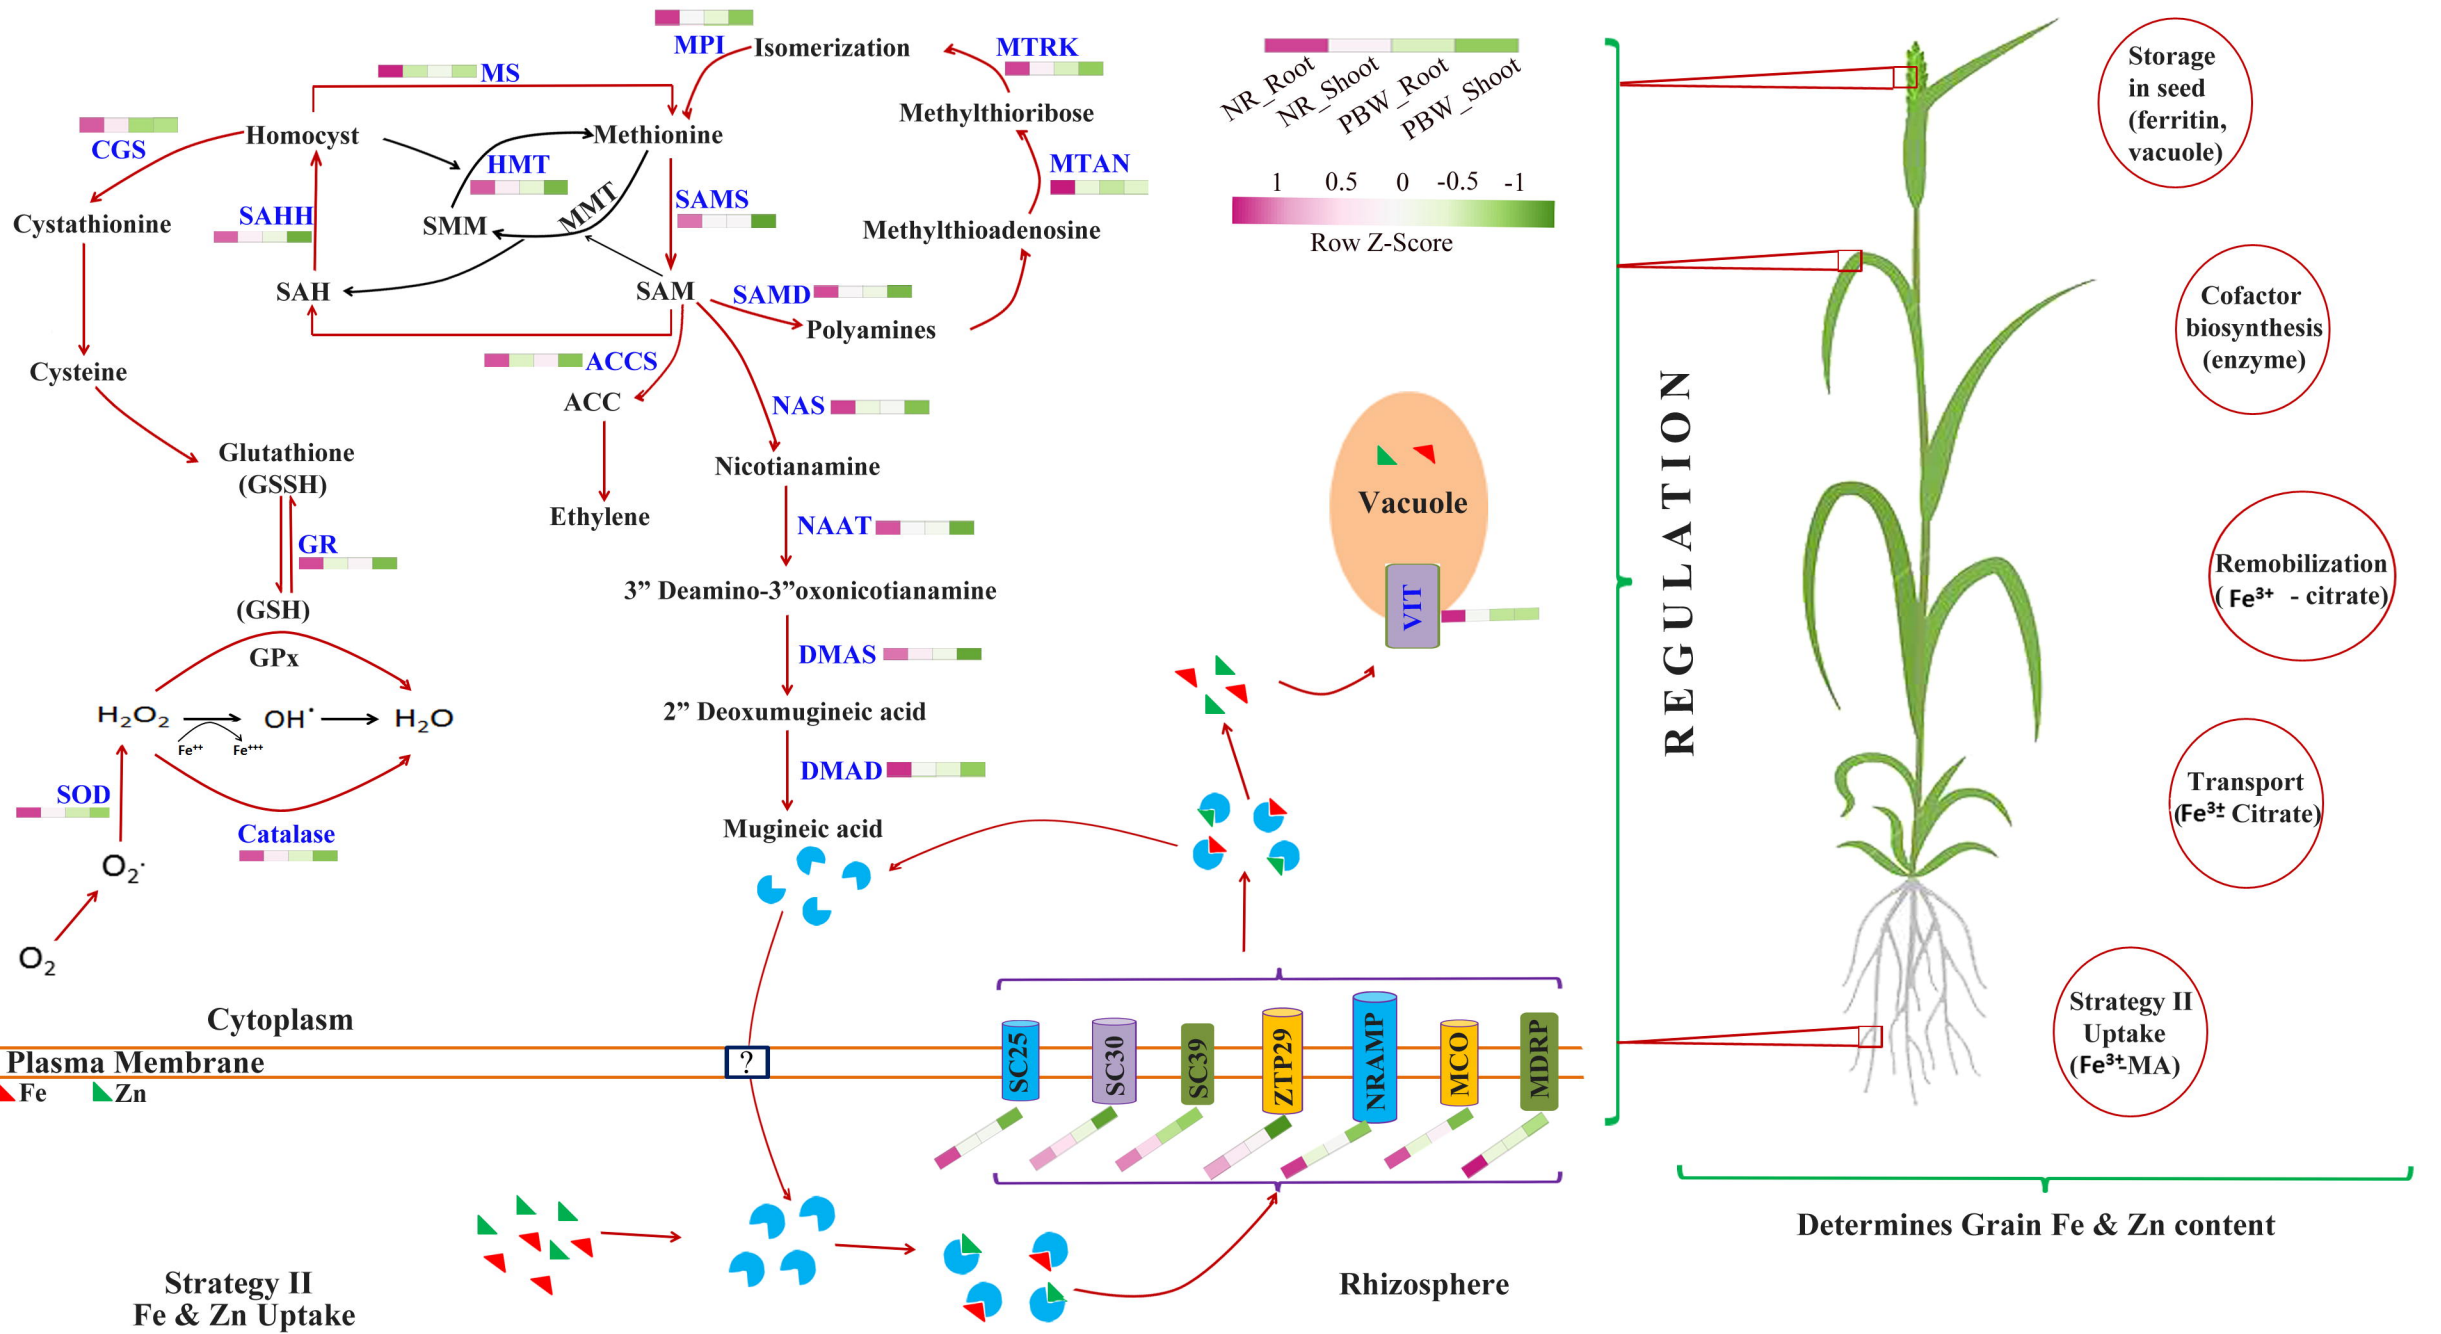

Source: https://biorxiv.org/content/10.1101/2021.04.03.438303v1.full.pdf
